# Supplementary material for: Rejuvenation of three germ layers tissues by exchanging old blood plasma with saline-albumin
Source: publisher site journal article supplement (doi:10.18632/aging.103418), 2020-05-30
Supplement: Supplementary file 1 [file aging-v12i10-103418-supplementary-material-SD3.xlsx]

## Sheet: Sheet1
Dataset 1. Mouse raw proteomics
ID	YY-YB	YY-YC	YY-Y1	YY-Y2	Y2 NBE	Y3 NBE	Y4 NBE	Y5 NBE	Y6 NBE	OO-O1	OO-O2	OO-O3	OO-O4	O2 NBE	O3 NBE	O4 NBE	O9 NBE
6Ckine	0	0.0625154	0.0358047	0.0521426	0	0	0	0	0.294934	0.0120662	0	0.0641712	0.0906231	0	0.0838216	0	0
Activin A	0.558198	0.0512181	0.0794236	0.0828276	0.24184	0.448341	1.0709	0.515794	0.709421	0.344376	0.366803	0.172211	0.346614	1.24882	0.310641	0.471672	1.35906
Activin C	0.426015	0.0730873	0.0293404	0.048892	0	0	0.662074	0.303273	0.313456	0	0.230429	0.0625302	0.147156	0	0.0892242	0.193955	0.779757
Activin RIB / ALK-4	0.587277	0	0.0401322	0.0697812	0.190358	0.378637	0.912029	0.458756	0.491302	0	0.330978	0.0851463	0.195541	0.907851	0.120951	0.267019	1.04847
Adiponectin / Acrp30	0.415511	0.159001	0.0389764	0.0713463	0	0.354049	0	0.28748	0.505475	0.0220023	0.410515	0.0839872	0.287581	0.768786	0.140095	0.271591	0.714858
AgRP	0.452914	0.101341	0.0870736	0.111409	0.185137	0.658966	0.820525	0.722656	0.704838	0	0.30532	0.159008	0.415684	0.923022	0.682656	0.716138	0.774653
ALCAM	0	0.0585327	0	0	0	0	0	0	0.333718	0.0118141	0.229964	0.0528095	0.166729	0.600374	0.061336	0.184578	0
Angiopoietin-like 2	0	0.108145	0.0236594	0.0521855	0	0	0	0	0.429975	0.0293527	0.340457	0.119626	0.154871	0.964553	0.116302	0.417975	1.1419
Angiopoietin-like 3	0.500675	0.154309	0.0448297	0.0802058	0.16207	0.350111	0.754738	0.473572	1.01165	0.0192027	0.487426	0.150833	0.427183	1.06594	0.419526	0.929624	1.32535
AR (Amphiregulin)	0	0.0984012	0	0.0756005	0	0.29851	0	0	0.425246	0	0.265748	0.0678146	0.153168	0	0.0810104	0.223727	0.733294
Artemin	0.456953	0.117797	0.0501741	0.0692923	0.226868	0.294238	0.875091	0.603853	0.351137	0.43822	0.600631	0.122311	0.295322	0.672745	0.274584	0.3017	0.829926
Axl	0	0.0722268	0.0423243	0.0530165	0.353733	0	0.925654	0.772026	0.326643	0.722891	0.567375	0.276348	0.320016	1.08854	0.183456	0.46543	1.73848
b FGF	1.21497	0.348143	0.195997	0.49311	0.975825	1.87546	2.10224	2.44315	0.969503	0.145348	0.338923	0.893826	1.04441	1.31966	2.91869	2.57108	0.981603
B7-1/CD80	0.409677	0.0726337	0.0404998	0.0585553	0.191241	0	0.66906	0.369957	0.36529	0	0.234321	0.15249	0.189666	1.08867	0.218917	0.47965	1.69059
BAFF R / TNFRSF13C	0	0.0991825	0.0450223	0.0553802	0	0	0	0	0.332709	0.0323931	0.27751	0.0856549	0.225502	0.624087	0.124516	0.20755	0.700114
BCMA / TNFRSF17	0	0.0911525	0.0328306	0.046516	0	0	0	0	0.33458	0.0150239	0	0.0886472	0.142748	0	0.167495	0.228136	0
beta-Catenin	0	0.0384786	0.0305259	0.050228	0.160892	0	0	0.303035	0.317398	0	0.225373	0.0601208	0.119797	0.741471	0.0876861	0.188852	0.789092
BLC	0.42838	0.0760331	0.0464685	0.0717158	0.176154	0.307383	0.882481	0.600789	0.406284	0.0152598	0.295671	0.133432	0.185938	1.31893	0.184675	0.408537	1.24011
BTC (Betacellulin)	0.474488	0.0624403	0.0465523	0.0643399	0	0.3233	0	0.381114	0.461288	0	0.293651	0.129551	0.406835	1.30994	1.16121	0.690652	1.5223
Cardiotrophin-1	0.42509	0.128583	0.0584106	0.0788502	0.207855	0.308559	0.678507	0.497007	0.510384	0.667222	0.542425	0.226268	0.456923	1.28551	0.441161	0.611573	1.28933
CCL1 / I-309 / TCA-3	1.64585	0.366826	1.91534	0.640013	0.734509	2.29305	2.35004	2.75938	2.29266	0.019214	0.395391	0.672538	1.30988	2.43998	2.58166	2.70367	1.61979
CCL28	2.26911	0.476677	1.20129	0.988566	0.966512	5.66847	2.82952	3.98614	4.40814	0.0198773	0.451467	1.55612	1.88528	2.90522	5.66139	7.14273	2.83584
CCL4 / MIP-1 beta	0.516017	0.14307	0.0637977	0.0876194	0.172303	0.396541	0.77634	0.279034	0.627041	0.159605	1.23035	0.196802	0.220412	1.60068	0.292216	0.728854	2.38515
CCL7 / MCP-3 / MARC	0	0	0.0280139	0.0511697	0	0	0	0	0.338433	0	0.201123	0.0889676	0.0706848	0.696728	0.0651232	0.17704	0
CCL8 / MCP-2	0.524725	0.07229	0.127852	0.13489	0.269467	0.656903	1.0575	1.49043	0.557213	0.122725	0.415639	0.204346	0.177635	1.50001	0.337574	0.544927	2.1094
CCR10	0	0.0541933	0.0269828	0.0548989	0.167656	0	0	0.258871	0	0	0	0	0.127896	0	0.0649502	0	0
CCR3	0	0.0798119	0.0331185	0.0506827	0.185255	0	0	0.322973	0.296592	0.0778118	0.369294	0.10034	0.17416	0.64552	0.117238	0.330159	0.966306
CCR4	0	0.0980972	0.170018	0.0707657	0.176684	0	0	0.369084	0.274076	0.0121091	0.229263	0.173533	0.0838372	1.85557	0.186681	0.330146	0
CCR6	0.521954	0.0945984	0.183366	0.299813	0.334476	0.616802	1.15636	0.724259	0.689009	0.0161249	0.332432	0.253693	0.373238	0.970234	0.571534	0.691368	1.38647
CCR7	0	0.0905552	0.0408011	0.0524376	0	0	0	0.338255	0	0.0141132	0.207403	0.0999582	0.120196	0.733284	0.148942	0.249917	0.752582
CCR9	0.40948	0.0930752	0.151778	0.104677	0.339996	0.680338	0.890508	0.481327	0.80376	0.0126236	0.211935	0.113625	0.412232	0.705881	0.481689	0.537869	0
CD11b	0	0.156491	0.0701951	0.105533	0.1944	0	0	0.316807	0.4821	0.0239771	0.236193	0.0874133	0.176607	0.605686	0.13157	0.211039	0
CD14	0.426398	0.0796635	0.0349416	0.0573683	0	0	0	0.29462	0.547263	0.0152072	0.250235	0.0906899	0.213251	0.903085	0.13794	0.37331	1.01518
CD27 / TNFRSF7	0	0.0731999	0	0.0480327	0	0	0	0	0.357576	0.0145265	0.208689	0.0513019	0.159713	0	0.095995	0.185716	0
CD27 Ligand / TNFSF7	0	0.158843	0.0709967	0.102268	0.167166	0.324894	0	0.319764	0.572452	0.420517	0.665707	0.220227	0.409093	1.0326	0.230434	0.562862	0.967892
CD30	0.41507	0.155848	0.051578	0.081235	0	0.318117	0	0	0.736556	0.179741	0.545517	0.106807	0.526961	0.816547	0.32439	0.409926	0.786822
CD30 L	0	0.0960355	0.0316904	0.0694187	0	0	0	0	0.404694	0.0135309	0.302529	0.0938847	0.159155	0.781158	0.0960793	0.309198	0.787571
CD40	0	0.0827386	0.055139	0.0526173	0.191566	0	0	0.320698	0.273782	0.358231	0.383845	0.130405	0.185485	0.700605	0.121928	0.20313	0.760767
CD40 Ligand / TNFSF5	0	0.093405	0.084555	0.0862016	0.204186	0.367686	0	0.390105	0.565421	0.0406517	0.439883	0.147698	0.380727	0.614564	1.97204	0.443735	0.840887
Cerberus 1	0	0	0	0	0	0	0	0	0	0	0	0	0	0	0	0	0
Chordin-Like 2	0.445416	0.082214	0.0417557	0.0645931	0.217587	0.318637	0.72583	0.371371	0.384288	0.0228112	0.32617	0.0971261	0.231555	0.843643	0.138338	0.297822	0.998547
Coagulation Factor III / Tissue Factor	0	0	0.0243767	0	0	0	0	0.252828	0.271356	0	0.260972	0.0632297	0.110214	0	0.121645	0.175828	0
Common gamma Chain / IL-2 R gamma	2.53922	0.515744	0.955121	0.874055	0.966206	4.24341	2.39453	2.75977	2.09106	0.0195	0.369087	0.950877	1.63199	1.96634	5.2802	6.06849	1.68074
CRG-2	0	0.10505	0.0866476	0.0826435	0.164656	0.38957	0	0.415761	0.643066	0.0294922	0.411908	0.175337	0.196101	1.25277	0.248829	0.508714	1.02836
Cripto	0	0.115113	0.0534269	0.0728611	0.166857	0.312358	0	0.343471	0.508074	0.0230402	0.36617	0.104463	0.4731	0.769484	0.394662	0.431665	0.833977
Crossveinless-2	0	0.0673282	0.0338038	0.0586243	0	0	0	0.260786	0.34739	0	0.24188	0.0737115	0.247557	0	0.150671	0.225937	0
CRP	3.23966	0.9174	1.2395	1.27194	1.29327	5.72923	2.83831	3.94225	4.2963	0.648292	0.482059	1.73471	2.61029	3.52855	7.24493	10.0275	3.15615
Cryptic	0.457163	0.298804	0.038295	0.0680865	0	0.30255	0	0.336308	0.626058	0.0679105	0.279362	0.0985703	0.225531	1.06445	0.159809	0.418157	1.23592
Csk	0	0.0927372	0.0619263	0.0759198	0	0	0	0.299632	0.363958	0.237696	0.369701	0.138357	0.122891	1.14675	0.174937	0.297971	0
CTACK	0.950689	0.435229	1.04884	0.82252	0.465202	4.96374	2.6004	4.03834	3.60294	0.0274576	0.700935	1.14984	2.12976	2.12974	5.56992	6.51659	2.37597
CTLA-4 / CD152	0.429027	0.159363	0.0696003	0.185555	0	0.371913	0.680006	0.355	0.665144	0.0205762	0.309138	0.120949	0.260641	0.96012	0.13516	0.364429	0.981644
CXCL14 / BRAK	0.571497	0.172016	0.356204	0.503157	0.165089	1.43518	1.35183	1.73807	2.21765	0	0.234939	0.362127	0.945188	1.12018	1.61326	1.52208	1.20064
CXCL16	0.577908	0.11284	0.0697386	0.103187	0.229002	0.388498	0.85744	0.875289	0.400312	0.0847365	0.577341	0.175931	1.20483	0.721161	0.322492	0.577811	1.05864
CXCR2 / IL-8 RB	0.39944	0.101266	0.0549821	0.0768517	0.188173	0.342068	0.846508	0.620647	0.339664	0.0567275	0.40563	0.135174	0.230003	0.609119	0.775802	0.326067	0.876617
CXCR3	0	0.0864213	0.0428094	0.0536621	0	0	0	0.260966	0.351154	0.0275876	0.258846	0.0876366	0.23777	0	0.114955	0.230591	0
CXCR4	0	0.0629357	0.0359283	0.053118	0	0	0	0	0	0	0	0	0.135213	0	0.0928857	0	0
CXCR6	0.746197	0.282404	0.692485	0.661887	0.818416	2.6879	1.64056	1.34633	1.64462	0.0157425	0.348628	0.567466	1.25311	1.44906	3.4894	3.64949	1.4319
DAN	0.464763	0.0781963	0.0402615	0.0641697	0.194788	0.340608	0.798411	0.385809	0.373351	0.0178227	2.83929	0.116419	0.128628	1.21637	0.114286	0.359421	1.34501
Decorin	0.507144	0.112321	0.0490232	0.0684111	0.187511	0.362156	0	0.428293	0.456627	0.0319568	4.69971	0.138054	0.340314	0.990097	0.230043	0.518421	1.15194
DKK-1	0	0	0.0307447	0.0486304	0.162614	0	0	0.268375	0.377656	0	0.245866	0.0619516	0.0838688	0.686795	0.0765948	0.185422	0
Dkk-3	0.422855	0.0901524	0.0636364	0.078123	0.229345	0.337791	0.762383	0.657785	0.59597	0.0848711	0.519907	0.224225	0.260657	2.08786	0.374465	0.822195	2.45613
Dkk-4	0	0.0915091	0.0350352	0.0660981	0.162094	0	0	0.327423	0.496702	0	0.21114	0.0730226	0.30383	0	0.155255	0.208125	0
DPPIV / CD26	0.426969	0.0887052	0.0488168	0.0636487	0.164015	0	0	0.476646	0.439738	0.0928592	0.665557	0.210976	0.221639	1.60935	0.585158	0.728128	1.69136
DR3 / TNFRSF25	0	0.0852953	0	0.0535266	0	0	0	0	0.44352	0.0143427	0	0.058472	0.218273	0	0.114379	0.189211	0
Dtk	3.3562	0.118002	0.106531	0.188055	0.271847	0.468832	0.879531	0.564646	0.766398	0.685402	2.39576	0.305585	0.479082	1.47652	0.283674	0.733665	1.39165
EDAR	0	0.112295	0.0762794	0.106213	0	0.420097	0.650788	0.58645	0.590746	0.0642932	0.683285	0.213664	0.409144	1.29704	0.409775	0.727069	1.50766
EGF R	0	0.0905257	0.034902	0.0664711	0.198148	0.337274	0	0.51781	0.428514	0.438805	0.352157	0.160403	0.174283	0.649126	0.137316	0.472088	0.81936
EG-VEGF / PK1	1.55989	0.285558	0.714407	0.736603	1.08662	3.64643	2.27832	2.263	1.42049	0.0177387	0.829882	0.811767	1.04756	1.07547	4.95266	4.34015	1.00451
Endocan	0	0.103404	0.0542963	0.0752968	0.804656	0.347566	0.886672	0.968583	0.266456	0	0.331399	0.160728	0.162113	1.37265	0.243709	0.311077	1.40138
Endoglin / CD105	1.01902	0.112764	0.429162	0.381886	0.161304	2.33534	1.38823	1.403	1.23195	0.0820848	0.257902	0.491775	0.62948	0.609816	1.97224	3.04724	0.81167
Endostatin	0	0.461546	0.106742	0.0583396	1.62515	0	0.708545	0.349352	0.288661	0.0178322	0.5421	0.122175	0.171861	2.05722	0.146219	0.297141	2.80012
Eotaxin	2.07379	0.0454293	1.22874	1.00302	0	5.99557	2.99146	3.59448	3.4154	0	0.453705	1.14779	2.08159	0	5.98704	7.51481	0
Eotaxin-2	0.897511	0.197255	3.08938	0.793166	1.24822	2.03906	2.44586	2.18646	2.38362	0.0610495	0.624133	0.475355	0.956811	2.62663	3.39068	3.65199	2.41777
Epigen	0	0.104815	0.0257645	0	0	0	0	0	0	0.0338794	0	0	0.0651656	0.756161	0	0	0.817089
Epiregulin	0	0.11435	0.0498976	0.0608726	0	0	0	0.736286	0.342293	0.0490944	0.371438	0.121354	0.13016	1.45018	0.131935	0.262965	1.81886
Erythropoietin (EPO)	0.448127	0.0984934	0.157706	0.0755293	0	0	0	0.694875	0.935661	0.101389	0.662763	0.779902	0.376656	1.36429	0.996458	1.58547	1.78766
E-Selectin	0	0.174505	0.0544344	0.077184	0.184167	0	0	0.441188	0.482805	0.393855	0.647591	0.206371	0.273908	0.804194	0.312721	0.96253	1.04723
FADD	0	0.139956	0.100288	0.151529	0.194887	0.362405	0	0.291829	0.519412	0.463662	0.502915	0.175116	0.274409	0.705071	0.198957	0.548712	0.953643
FAM3B	0	0.116596	0.031646	0.0769401	0	0	0	0.29421	0.445874	0.016371	0.241388	0.0887098	0.14054	0.708154	0.11246	0.231595	0.750307
Fas / TNFRSF6	5.16588	8.15651	5.1091	3.30454	4.08648	10.6224	6.00707	9.4016	7.40223	4.43036	7.03607	4.66896	11.0824	7.32924	10.0466	19.0531	3.49797
Fas Ligand	0	0.028684	0.0361291	0	0.159761	0	0.753135	0.420923	0	0.250854	0.227863	0.167861	0.0831367	0	0.124473	0.225682	0.892997
FCrRIIB / CD32b	0.563207	0.0765365	0.0479621	0.0711039	0.185121	0	0	0.371715	0	0.034135	0.365673	0.097665	0.170697	0	0.487927	0.21532	0.713122
FGF R3	0	0.0755619	1.34132	0.131921	0.248635	0.325524	1.00206	0.708666	0.371161	0.0190798	0.274168	0.190623	0.337471	1.01215	0.377619	2.6609	0.844083
FGF R4	0.512545	0	0.0396025	0.0667432	0.192914	0.318165	0.773441	0.389747	0.298046	0	0.224014	0.0691128	0.0780119	0.644816	0.09673	0.186015	0.740025
FGF R5 beta	0	0.103898	0.035963	0.0519569	0	0	0	0.341482	0	0.053751	0.427836	0.0869473	0.146418	0	0.102432	0.227949	0.75474
FGF-21	0	0.0380351	0.0415575	0.0491918	0.160936	0	0	0.285672	0.340409	0.316145	0.266539	0.132373	0.157372	0.704655	0.11602	0.305182	0.812484
Fit-3 Ligand	0	0.0347219	0.0461579	0.0466075	0	0	0	0.314753	0.277003	0	0.214391	0.0933512	0.0743887	0.719424	0.11144	0.181433	0
FLRG (Follistatin)	0	0.0990958	0.0520971	0.0624522	0	0	0	0.399605	0.303182	0.0377801	0.552436	0.12365	0.139773	0.877098	0.155376	0.296156	0.949106
Follistatin-like 1	1.82802	0.127708	0.59984	0.332568	0.683153	1.93771	1.50458	1.60436	1.40264	0	0.558759	0.403473	0.886179	1.44866	1.12739	3.12911	1.48779
Fractalkine	0.444392	0.085377	0.0348787	0.0574592	0.172142	0.31564	0.986979	1.0994	0.394956	0.0184924	0.376835	0.180788	0.203121	1.0997	1.10612	0.594472	1.55293
Frizzled-1	0.420359	0.0857286	0.0366402	0.0648926	0.169856	0.332705	0.752121	0.455813	0.480138	0.547771	0.544156	0.178838	0.129769	0.870473	0.130412	0.419473	1.22446
Frizzled-6	1.81358	0.209612	0.637635	0.699369	0.639146	3.8635	1.71689	2.37365	2.8563	0.0149785	0.28296	0.783364	1.47021	1.46816	4.59101	6.31132	2.0068
Frizzled-7	0.799181	0.1081	0.0868785	0.204331	0.404476	0.468218	1.12785	1.76549	0.641117	0.993157	0.556989	0.357604	0.245614	1.42646	0.268385	1.10666	1.78788
Galectin-3	0	0.171667	0.0562897	0.053451	0	0	0	0.346834	0	0.0939754	0.346417	0.191799	0.193705	1.30289	0.189078	0.257987	1.47507
G-CSF	0	0.102844	0.0646618	0.091576	0.163469	0.367093	0	0.361347	0.51417	0.415626	0.491731	0.222996	0.221747	0	0.289391	0.556493	0
GDF-1	0	0.0968819	0.0339257	0.051935	0.160322	0	0	0	0	0.0281958	0	0	0.100255	0	0.062046	0	0
GDF-3	0	0.0809317	0.0674575	0.0668165	0.188269	0	0.78334	0.999877	0.320856	0.0445135	0.37088	0.183268	0.131433	0.997488	0.400495	0.403171	1.36038
GDF-5	0.524072	0.128152	0.402079	0.32084	0.704517	1.13701	1.20215	0.863001	0.838274	0.343033	0.695834	0.257176	0.382943	1.45933	1.072	2.65009	2.18929
GDF-8	1.10676	0.409871	1.09826	1.10809	1.41383	4.88409	2.82813	3.6468	3.13843	0.0205796	0.347978	1.08453	1.68624	1.71798	5.4177	5.99345	2.03008
GDF-9	0	0	0.0248235	0	0	0	0	0	0	0	0	0	0	0	0.0603703	0	0
GFR alpha-2 / GDNF R alpha-2	0	0.0832658	0.0355121	0.0524239	0	0	0	0	0	0.0148832	0.203812	0.0559502	0.140773	0	0.0645215	0	0
GFR alpha-3 / GDNF R alpha-3	0	0.0877352	0.0352706	0.0592429	0	0	0	0.282846	0.308895	0.0148415	0.224525	0.06617	0.148109	0	0.0819718	0.158399	0
GFR alpha-4 / GDNF R alpha-4	1.67119	0.128513	0.127071	0.17968	0.285241	0.465852	1.0224	1.11053	0.541689	0.204708	1.83363	0.289281	0.228198	1.55557	0.550587	0.791612	1.82818
GITR	0	0.102308	0.0509584	0.0786134	0	0	0	0.339838	0.387637	0.712662	0.56514	0.20255	0.164761	0.798457	0.219485	0.332108	0.809113
GITR Ligand / TNFSF18	0	0.102447	0.0304937	0.061974	0	0	0	0.302286	0.372288	0.0148253	0.24111	0.08269	0.177498	0	0.107343	0.205819	0
Glut2	2.96044	0.302161	1.02618	0.717994	0.855001	4.72392	1.86935	3.04988	3.23532	0	0.237128	0.911522	1.68388	1.68843	3.31294	7.97871	2.1879
GM-CSF	0	0.161192	0.063912	0.102229	0	0	0	0.596035	0.477826	0.200243	0.477331	0.183025	0.253477	1.13818	0.270762	0.672164	1.19564
Granzyme B	0.438179	0.140099	1.92371	0.0845024	0.181063	0.390859	1.21662	0.666794	0.614001	0.0231799	0.569326	0.248068	0.204974	2.62446	0.228618	0.877222	1.2385
Granzyme D	0	0.0673306	0.039077	0.0567111	0.168959	0	0	0.319975	0	0.303775	1.96834	0.119597	0.175247	0	0.106183	0.215356	0.707843
Granzyme G	0	0.0578364	0.0335728	0	0	0	0	0	0	0	0	0.0698225	0.0904275	0	0.0706362	0	0
Gremlin	0.552732	0	0.0370937	0.0573123	0.217504	0.335328	0.809522	0.362578	0.303484	0	0.260614	0.0670544	0.0768753	0.684771	0.0743125	0.180395	0.849252
Growth Hormone R	0.572006	0	0.0449782	0.0681158	0.22242	0.389154	0.907407	0.406908	0.348279	0	0.286749	0.0781678	0.0927616	0.779701	0.0942127	0.2229	0.936846
HGF R	0.412964	0.106921	0.0681722	0.0695097	0.168926	0	0.718955	0.555229	0.313854	0.0400764	0.470502	0.205223	0.1132	1.05669	0.489376	0.347838	1.19183
HGF	0.590997	0	0.0530271	0.0787609	0.251863	0.398945	0.950207	0.476254	0.440736	0	0.319985	0.113316	0.1152	0.965138	0.111982	0.26307	1.08704
HVEM / TNFRSF14	0	0.0853155	0.0507439	0.0705233	0.183957	0.350978	0	0.497611	0.35606	0.0162019	0.220125	0.0901014	0.121164	0	0.18185	0.28358	0
ICAM-1	0	0.507582	0	0	1.38927	0	0	0	0	0.0188823	0	0	0	2.28471	0	0	2.84515
ICAM-2 / CD102	3.16486	0.0911487	1.2037	1.02335	1.73388	4.70171	2.937	3.64527	3.14998	0.0162112	0.52221	1.15111	1.92695	1.8071	6.01942	7.28515	2.11344
ICAM-5	0	0.109943	1.45631	0.969027	0.164525	5.30755	2.18634	4.14064	4.73548	0.0188537	0.349583	0.782582	2.64829	0.889611	2.70476	8.41749	0.966607
ICK	0	0.0850698	0.201647	0.0622804	0.805792	0	0.751417	0.478795	0.423573	0.0275271	0.30904	0.206689	0.289907	1.06423	0.115228	0.368502	1.39123
IFN-alpha / beta R1	0	0.103145	0.753929	0.873233	0	4.5881	2.32112	4.09983	3.76962	0.0165702	0.259035	0.796627	1.57974	0	4.54431	6.01855	0
IFN-alpha / beta R2	0	0.129851	0.0309633	0.0616298	0	0	0	0.290439	0.380733	0.0348772	0.240273	0.0812497	0.130279	0	0.103483	0.197305	0
IFN-beta	0	0.0809401	0.0271781	0.0541214	0.553012	0	0	0	0.321177	0.0257899	0.385816	0.0680603	0.0992298	1.188	0.0736367	0.192556	1.34279
IFN-gamma	0	0.0720781	0.605744	0.616893	0.189395	3.20853	1.45489	1.84215	2.37438	0.058458	0.245146	0.695078	1.29296	0.755606	3.19251	4.06034	1.16412
IFN-gamma R1	0	0.267639	0.154739	0.126044	0	0.304439	0.825186	0.446925	0.385	0.0149686	0	0.228753	0.169807	0	0.277216	0.436725	0
IGFBP-1	0.861084	0.278978	0.0336929	0.0514746	1.0236	0	0	0	0	0.0172708	0.239511	0	0.145174	1.1735	0.0674943	0	1.44851
IGFBP-2	1.01684	0.223553	0.120848	0.139293	0.825379	1.12418	1.79856	2.69855	0.98947	0.0188898	0.506693	0.377193	0.367665	0.957176	0.972226	1.04865	1.14573
IGFBP-3	0.564879	0.308367	0.0614856	0.124187	1.17256	0.368315	0.887877	0.724138	0.475398	0.0172376	0.520436	0.188159	0.161201	1.33652	0.397416	0.471494	1.80462
IGFBP-5	1.61256	0.0773224	0.806613	0.713147	0.210209	3.19988	2.33112	2.65063	1.7406	0.0132896	0.592094	0.913743	0.879074	0	3.45722	3.18771	0
IGFBP-6	0.525018	0	0.599586	0.603109	0	2.57184	1.65822	1.65082	1.33052	0	0.211747	0.634991	0.75638	0.736998	2.59871	2.46261	0.725042
IGFBP-rp1 / IGFBP-7	1.01278	0.0501945	0.758342	0.916653	0	4.28664	2.76381	3.64496	2.26342	0	0.247915	0.996327	1.41138	0	5.33308	4.87568	0
IGF-I	0	0.125195	0.0929907	0.103261	0.359873	0.394265	0	0.436591	0.350087	0.649713	0.2087	0.132793	0.236939	2.71112	0.140135	0.182674	2.28427
IGF-II	0.471796	0.124869	0.0344946	0.0528599	0.224648	0	0.707363	0.344175	0.304871	0.0414196	0.21542	0.0696895	0.0769988	1.2998	0.0877671	0.190433	1.2508
IL-1 alpha	0	0.338258	0.0300932	0.0566361	1.75096	0	0	0	0	0.0153304	0	0.0661199	0.105545	2.3245	0.117274	0	2.7235
IL-1 beta	4.09384	0.0668069	1.44484	1.08273	0	5.70545	2.83085	5.05905	5.10253	0.422197	0.564578	1.01688	2.83821	0.974335	3.50338	9.14517	1.00896
IL-1 R4 / ST2	0	0.489276	0.189069	0.064763	0.834165	0.293424	0.739128	0.437016	0.45734	0.0219517	0.398547	0.21099	0.344318	1.52841	0.112358	0.529618	1.46388
IL-1 R6 / IL-1 R rp2	1.85185	0.0746709	0.656542	0.840614	0	4.56116	2.41879	3.71296	4.00411	0.0121093	0.436832	0.850212	1.80744	0.717299	4.67473	6.3258	0.735778
IL-1 R9	0	0.0549306	0.0349316	0.0603959	0	0	0	0.313696	0.434138	0	0.269915	0.090117	0.159	0	0.110908	0.218147	0
IL-1 RI	0	0.4818	0.0245498	0	0.810936	0	0	0	0	0.0154552	0	0	0	0.820966	0	0	1.22587
IL-1 RII	0.964103	0.0945249	0.560726	0.552035	0.297797	2.69538	1.88711	1.90367	1.13182	0.0596364	0.223847	0.500629	0.664044	0.952176	2.6963	2.10368	1.38953
IL-10	0.399227	0.119626	0.216623	0.192962	0.192223	0.518562	1.20088	0.596683	0.553652	0.118179	0.545541	0.2957	0.163588	0	0.343089	0.422496	0
IL-10 R alpha	0	0	0.0496321	0.0783703	0	0	0	0.263498	0.517038	0.218923	0.304126	0.0898179	0.282417	1.31465	0.0980015	0.191155	1.09978
IL-11	0	0.696729	0.0313972	0.0561788	1.52478	0	0	0.30523	0.340619	0.0179833	0.208245	0.185419	0.119214	2.42333	0.089321	0.19797	2.24991
IL-12 p40/p70	2.56522	0.131428	1.36599	1.4213	0	6.36538	3.47253	4.336	4.67475	0.0637367	0.39794	2.04572	2.58925	0	7.41314	10.1543	0
IL-12 p70	0	0.288784	0.052269	0.0852056	0.197215	0	0	0.252335	0.624167	0.0211975	0.25041	0.123029	0.298497	0.613053	0.121449	0.256904	0.730868
IL-12 R beta 1	0	0.0488167	0.179033	0.276296	0.173003	0.524872	0.987161	0.336096	1.03288	0.0154341	0.287544	0.154337	0.286412	0	0.402599	0.698661	0
IL-13	0	0	0.0428211	0.0589681	0.42329	0.296657	0	0.321113	0	0.0147542	0.201943	0.0728405	0.103541	0.796755	0.0776922	0	1.22911
IL-13 R alpha 2	0.470392	0.0897511	0.0958092	0.092424	0	2.46922	1.4792	0.980346	3.27302	0.0312622	0.398832	0.195499	0.193825	0.807183	0.203359	0.349834	1.06003
IL-15	0	0.0391598	0.0575557	0.0721328	0	0	0	0.341523	0	0.0252175	0.252431	0.139655	0.077164	0.955833	0.205835	0.222372	1.23655
IL-15 R alpha	0	0.151923	0.0366249	0.0475859	1.074	0	0	0.272468	0.316579	0.0163961	0.244316	0.171179	0.0695623	1.31258	0.119671	0.233715	1.40257
IL-16	0.733858	0.224501	0.740047	0.534626	0.780843	3.03633	2.29262	1.98093	1.77185	0.0176809	0.259217	0.588488	0.960572	2.1816	3.33193	3.65776	2.1132
IL-17	2.57823	0.0737238	1.20838	0.860951	0.328993	5.76299	3.68748	4.85564	3.23835	0.063545	0.383244	1.19767	1.87556	0	6.57685	7.57124	0
IL-17BR	0	0.0875812	0.142232	0.160506	0.163287	0.493596	0.75662	0.385959	0.784351	0.0189268	0.228371	0.158479	0.440096	0.62334	0.179776	0.384569	0.72142
IL-17C	0	0	0.04412	0.056967	0	0	0	0.309071	0.291281	0.0180253	0.337965	0.170345	0.107679	0	0.161877	0.215109	0
IL-17D	0	0.0830412	0.0267017	0	0.182884	0	0	0	0	0.0133499	0	0.0568469	0.159256	0.724239	0.0556408	0	0.77812
IL-17E	0	0.108171	0.0400317	0.0636257	0.203025	0.29465	0.8477	0.335503	0.405718	0.0503113	0.258275	0.0943306	0.149741	1.11896	0.108445	0.218147	1.31924
IL-17F	0.427827	0.0311903	0.0522213	0.0774397	0	0.343414	0.845197	0.591891	0.470155	0	0.613677	0.185855	0.14276	0.644602	0.244785	0.404731	0
IL-17R	0	0.317995	0.0291567	0.0554264	1.06826	0	0	0	0.30907	0.0213805	0	0.0871393	0.122606	1.99586	0.0946381	0.18321	2.74935
IL-17RC	2.47102	0.110931	1.14679	1.34866	0.174436	5.33126	3.42967	3.48208	4.12943	0.0301935	0.398388	1.27947	2.75649	0.656237	7.23003	9.74466	0
IL-17RD	0	0.0627229	0.0484506	0.0675903	0	0	0	0.29104	0.406279	0.0121255	0.199705	0.118088	0.151541	0	0.120768	0.206454	0
IL-18 R alpha/IL-1 R5	0	0.0317441	0.0301842	0	0.266498	0	0	0	0	0.826501	0.203064	0.089991	0	0.827322	0.118337	0	1.5007
IL-2	0	0.0812236	0.0603637	0.0670347	0	0	0	0.285797	0	0.0131681	0.47167	0.211775	0.161523	0	0.132393	0.221717	0
IL-2 R alpha	0	0.0797087	0.0303792	0.0494256	0	0	0	0	0	0.0209791	0	0.0531412	0.156633	0.616255	0.0678572	0	0
IL-2 R beta	0	0.0901345	0.0619954	0.0480488	0	0	0	0.364739	0	0.0216436	0.238624	0.123777	0.124129	0	0.135122	0.183893	0
IL-20	0	0.0569269	0.0323035	0.0527622	0.222511	0	0	0.319135	0	0.0341649	0.232218	0.0737366	0.214447	0.957878	0.137134	0	1.32288
IL-20 R alpha	0	0.0961507	0.0691079	0.0804302	0.164187	0.320663	0.800925	0.436586	0.359401	0.36179	0.320582	0.165998	0.192308	0.717344	0.200443	0.253404	0.843324
IL-21	0	0.0341025	0.0417835	0.0534907	0.185135	0	0	0.388855	0.485748	0	0.285028	0.115852	0.122014	0.764542	0.18439	0.448574	0.716998
IL-21 R	0.410196	0.0519516	0.0400387	0.0590397	0.208916	0	0.654427	0.310506	0.303128	0.515458	0.225989	0.0860325	0.0723849	0.852185	0.0729811	0.161017	0.983453
IL-22	0.458634	0.101078	0.0423069	0.0611308	0.177468	0.307541	0.760708	0.327458	0.342273	0.0484047	0.423768	0.116146	0.0893945	0.891203	0.0816437	0.349757	1.15059
IL-22BP	0.479753	0.0754345	0.0557766	0.0684798	0	0	0.706816	0.450541	0.331144	0.0134104	0.477232	0.131571	0.133871	0	0.17123	1.2642	0
IL-23	0	0.0412269	0.0322835	0.0532749	0	0	0	0.264111	0.296115	0.0124218	0.215178	0.0697245	0.143507	0	0.0623039	0	0
IL-23 R	0	0.396649	0.0276576	0	1.24962	0	0	0	0	0.0190627	0	0.0633106	0.0864609	2.21084	0.0567561	0	1.64834
IL-24	3.1172	0.0812903	1.134	0.881269	0	4.44442	3.05551	3.89386	3.5405	0.0132643	0.511374	1.1653	2.03174	0.604076	6.48148	7.84925	0
IL-27	0	0.376089	0.0351701	0.0533676	1.42872	0	0	0.256049	0.333553	0.0226603	0	0.0840177	0.093753	2.8473	0.121362	0.193406	2.7045
IL-28 / IFN-lambda	2.61046	0.32088	1.25887	1.12146	1.05175	6.06695	3.65071	4.78476	3.86919	0.0216559	1.08759	1.36076	2.51287	1.73047	5.09455	9.55147	1.98127
IL-3	0.647083	0.0911214	0.942456	1.03586	0.195573	4.87078	2.80377	3.23758	3.75813	0.0536832	0.328082	1.23199	2.26192	0	6.41134	8.0183	0
IL-3 R alpha	0	0.0367403	0.0504676	0.0729547	0.476447	0	0	0	0.440644	0	0.204847	0.0869106	0.18722	0.902373	0.0788293	0	0
IL-3 R beta	0.609429	0.132288	0.20561	0.211273	0	0.902633	1.16935	0.80936	0.647511	0.0323322	0	0.175055	0.290709	0.673402	0.822513	1.01956	0.736363
IL-31	0	0.18588	0.0579174	0.0742172	0.458082	0	0	0.453427	0.341013	0	0.400373	0.131873	0.179057	1.33309	0.351912	0.337459	1.28177
IL-31 RA	0.98661	0	0.370014	0.359849	0	1.89473	1.39769	1.33002	1.40002	0	0.228412	0.436155	0.736685	0	2.03366	2.78512	0
IL-4	0	0.0311105	0.0402735	0	0.214658	0	0	0.259895	0	0.440888	0	0.0663402	0	0.962036	0.0823581	0	1.10412
IL-4 R	0.439637	0.0909926	0.0634357	0.0680101	0	0.35217	0.863722	0.4166	0.527257	0	0.358128	0.185625	0.205387	0	0.183899	0.319806	0
IL-5	0	0.160773	0.0356246	0.0669252	0.18897	0.308147	0	0.326741	0.392118	0.193319	0.219038	0.0798416	0.156601	0	0.130796	0.200542	0
IL-5 R alpha	0	0.088552	0.0766876	0.113112	0	0	0	0.283412	0.640078	0	0.437452	0.113642	0.412977	0	0.15088	0.243328	0
IL-6	0	0.0903273	0.0367581	0.0594453	0	0	0	0.255013	0.364737	0.0703157	0.224932	0.0685653	0.256361	0	0.094291	0.171865	0
IL-6 R	0	0	0.0294121	0.0537698	0.343841	0	0	0	0.395478	0	0.267132	0.0592274	0.239478	1.07563	0.0727108	0.173718	1.27051
IL-7	0.727746	0	0.0647033	0.0994967	0.259189	0.552543	1.22692	0.549351	0.522751	0	0.387169	0.113678	0.127535	0.819063	0.118291	0.288954	0.987997
IL-7 R alpha	0.560721	0.033903	0.0453003	0.0737802	0.299213	0.419317	0.93957	0.405425	0.393589	0	0.304068	0.0877913	0.10267	0.96523	0.0912802	0.236653	1.03124
IL-9	0.623661	0.179209	0.0636865	0.100584	0.16252	0.434843	1.02158	0.490573	0.552116	0.0370644	0.318004	0.144096	0.137704	0.624947	0.130584	0.299466	0.735061
IL-9 R	2.59613	0.276897	0.0526826	0.0729636	0.441826	0	0	0.315533	0.311514	0.314319	1.67752	0.121332	0.199553	1.77353	0.117824	0.228959	2.20994
Insulin	2.72779	0.0415588	0.530648	0.206431	0	0.795111	1.30784	2.2752	0.653473	0.0130745	1.43316	0.326576	0.833013	0	0.737978	3.32361	0
Integrin beta 2 / CD18	0	0.0561137	0.0405835	0.0461423	0	0	0	0.264807	0	0.0236013	0	0.090838	0.106916	0	0.0776525	0	0
I-TAC	0	0	0.0334587	0	0	0	0	0	0	0	0	0.0855745	0.0681939	0	0.069275	0	0
KC	0	0	0.0288775	0	0	0	0	0	0	0.0149438	0	0.0773642	0.0605597	0.72177	0.0662429	0.172349	0.952442
Kremen-1	0	0.0843243	0.04156	0.0587617	0	0	0	0.299585	0.494974	0.0193771	0.239171	0.0977229	0.0931908	0.825047	0.0819462	0.199659	0.940875
Kremen-2	0	0.0722684	0.0365897	0.0529152	0	0	0	0.268506	0.278369	0.0134303	0.202706	0.0666375	0.115606	0	0.068689	0	0
Lefty-1	0	0.0890961	0.1973	0.121827	0.207961	0.526255	0.826099	1.19264	0.39651	0.0172417	0.547545	0.28119	0.732927	1.02513	0.334856	0.868659	1.89041
Leptin R	0	0.102514	0.0420995	0.0589519	0.162704	0.364027	0.817859	0.439726	0.395397	0.0313644	0.295886	0.121623	0.101866	0.853409	0.19736	0.376125	0.851081
LEPTIN(OB)	0	0	0.0412067	0.0551707	0	3.83242	0.73682	0.294945	0.331009	0	0.351324	0.0912127	0.0920582	0	0.0923003	0.24637	0
LIF	0	0.0952807	0.02641	0	0.526626	0	0	0	0.315728	0	0	0.060204	0.0874936	1.41245	0.0548323	0.154164	1.07534
LIGHT / TNFSF14	0.794422	0	0.296308	0.297752	0.165532	1.17521	1.43007	1.0843	1.08086	0.014288	0.257273	0.332253	0.531165	1.05912	1.55676	2.05255	0.970354
LIX	0	0.217846	0.0378663	0.062866	1.09322	0.294183	0.67474	0.325943	0.368695	0.0138206	0.269318	0.134363	0.113525	1.81124	0.135184	0.25371	1.89348
LRP-6	2.27012	0.0980463	0.84179	0.766789	0.300894	3.97795	2.95184	3.35635	2.96155	0	0.412047	0.999571	1.94726	0.647604	6.36847	6.89688	0
L-Selectin	0	0.112087	0.1195	0.136294	0.312138	0.710881	0.835366	0.600696	0.767816	0.339192	0.251401	0.127761	0.399627	0	0.388287	0.561824	0.919087
Lungkine	0	0.0852936	0.373944	0.320656	0.590443	2.07776	1.45599	1.12376	0.838121	0	0	0.273511	0.388103	0.643414	2.06507	1.63687	0.980862
Lymphotactin	0	0.0667519	0.0308806	0	0	0	0	0	0	0.0170885	0	0.0565321	0.117017	0	0.0637163	0	0
Lymphotoxin beta R / TNFRSF3	0.870744	0.30381	0.587507	0.522245	1.05746	3.82504	2.2217	2.78487	1.73977	0.0155197	0.271747	0.542715	1.04571	1.14941	3.44608	3.30048	1.44715
MAdCAM-1	1.3402	0.0766855	0.744737	0.585437	0.160365	3.47927	2.60328	2.57218	1.87034	0.581252	0.333491	0.571204	1.02078	0.636304	3.53637	4.57129	0
MCP-1	0	0.0456514	0.0530074	0.0476381	0	0	0	0.292189	0	0.0210732	0.37016	0.148501	0.135734	0	0.109992	0.304721	0
MCP-5	0	0.159024	0.0398969	0.0515828	0.277024	0	0	0	0.280811	0.0235183	0	0.0591954	0.218794	1.59248	0.0767406	0	0.717532
M-CSF	0	0.107571	2.52137	0.10473	1.08363	0.425035	1.66368	0.671744	0.559287	0	0.377618	0.225977	0.397228	1.45463	0.168265	0.531832	1.36464
MDC	0.458441	0.122293	0.124339	0.118129	0.260087	0.453285	0.90501	0.757303	1.03615	0.086515	0.59818	0.216181	0.360868	1.03541	0.372926	0.665087	1.21813
MFG-E8	0	0.0773895	0.038459	0.0621171	0.166872	0	0.71134	0.396012	0.363382	0.0294055	0.31357	0.134457	0.107964	1.26532	0.222153	0.324538	1.33741
MFRP	0	0.087121	0.0292687	0.0469379	0	0	0	0	0.309068	0.0141297	0.258673	0.0695392	0.205739	0	0.111924	0.163462	0
MIG	0.456434	0.0328111	0.044138	0.0755523	0.242682	0.399436	1.00313	0.43633	0.573784	0	0.367696	0.104387	0.150107	0.98828	0.116844	0.299744	1.00633
MIP-1 alpha	0.409642	0	0.040096	0.0718297	0.213085	0.383554	0.917846	0.37244	0.60188	0	0.393253	0.118941	0.165685	1.34053	0.109384	0.34541	1.4478
MIP-1 gamma	0	0	0.0450536	0.0585705	0.173108	0.303301	0	0.329428	0.48485	0.64419	0.471117	0.266335	0.249205	0.979642	0.180377	0.385179	1.38082
MIP-2	0.508885	0.0795676	0.141603	0.156111	0.578867	0.739479	1.03603	0.903695	0.48998	0	0	0.151691	0.190975	0.629487	0.780398	1.06438	0.939128
MIP-3 alpha	0	0	0.0332784	0	0	0	0	0	0.4879	0.482547	0.330076	0.122482	0.0800901	0	0.086543	0	0.801414
MIP-3 beta	0.42407	0	0.0445839	0.0598994	0.191093	0.303992	0.6624	0.323692	0.312456	0.0258348	0.222051	0.0921875	0.0706508	0.628808	0.0923269	0.194411	0.91449
MMP-12	0	0.0268127	0.0239953	0	0	0	0	0	0	0	0	0	0	0	0	0	0
MMP-14 / LEM-2	0	0.0663715	0.0396114	0.0571032	0	0	0	0	0.279518	0.0241831	0	0.0565588	0.127302	0	0.0736678	0	0
MMP-2	0.416578	0	0.133183	0.131381	0.250792	0.37322	0.863361	0.782502	0.356456	0	0	0.102779	0.153569	0	0.190746	0.237632	0
MMP-24 / MT5-MMP	0	0.0395192	0.0417461	0.048869	0	0	0	0.306492	0.292431	0.0134992	0.235943	0.0822365	0.0804447	0.897938	0.0698327	0.211858	0.882479
MMP-3	0	0.0656502	0.040342	0	0	0	0	0	0	0.0458299	0.361425	0.0674239	0	0	0.0732233	0.167798	0.846153
MMP-9	0	0	0.0456654	0.05854	0.197882	0.293949	0	0.33428	0.293338	0	0	0.0688623	0.128589	0	0.0811666	0.16359	0
Neuregulin-3 / NRG3	0	0.0760842	0.0332549	0.0501303	0.161092	0	0	0.263741	0.314759	0.0137616	0.216835	0.064702	0.154057	0	0.0642663	0.157829	0
Neurturin	0	0.0826686	0.0355318	0.0550827	0	0	0	0.274299	0.320115	0.0175296	0.241626	0.0815543	0.122346	0	0.0891006	0.166012	0
NGF R / TNFRSF16	0	0.0722567	0.0272882	0	0	0	0	0	0.267428	0.0126478	0	0.061925	0.154986	0	0.0630885	0.182402	0
NOV / CCN3	0	0.111709	0.0530855	0.0677837	0	0	0	0.31612	0.403248	0.0679491	0.500843	0.14713	0.251217	1.07873	0.130016	0.386464	1.27604
Osteoactivin / GPNMB	0	0.173644	0.348824	0.357953	0.548582	1.97711	1.54361	1.599	1.53851	0.017157	0.285395	0.410323	0.870594	1.06991	1.86937	2.4235	1.20616
Osteopontin	0	0.0793351	0.0907547	0.0924625	0.189016	0.467135	0	0.478707	0.274991	0.0168061	0.360711	0.113197	0.133776	0	0.324151	0.226588	0
Osteoporotegerin	0.463782	0.0694345	0.0869033	0.079406	0.245067	0.363081	0.90873	0.608535	0	0.173904	0.615559	0.190952	0.104705	0.839577	0.272266	0.316194	1.54112
OX40 Ligand / TNFSF4	0	0.0739356	0.0358622	0	0	0	0	0	0	0.0265513	0.240508	0.0750784	0.123691	0	0.0702244	0.195337	0
PDGF C	4.36981	0.0886092	0.181813	0.155933	0.189868	0.803976	4.1532	5.04118	0.829085	0.571544	0.852273	0.178519	0.231803	0	0.328474	0.61208	0.690714
PDGF R alpha	0	0.076668	0.0486076	0.0534826	0	0	0.691534	0.483287	0	0.0260432	0.332313	0.0962769	0.0834917	0	0.066411	0.190599	0.868248
PDGF R beta	0	0.0941763	0.0719448	0.0557691	0.273711	0	0.829538	0.293169	0	0.470117	0.218733	0.102121	0.119364	0	0.112871	0.223008	0
Pentraxin3 / TSG-14	0	0.0707638	0.0523925	0.0575699	0.581486	0	0	0.296595	0.283369	0	0.362172	0.107832	0.221342	0	0.138267	0.191945	0
PF-4	0	0.214233	0.334093	0.290816	1.50624	1.66643	1.56253	1.18305	0.921377	0	0	0.195377	0.673418	1.60589	1.4871	1.73092	1.73445
PlGF-2	1.16096	0.0853771	1.33756	0.989805	0.167151	2.72555	3.31286	3.46947	2.20485	0.216748	0.757827	1.10425	1.64705	1.27962	1.73365	1.70948	1.79342
Progranulin	0	0.0826605	0.0634452	0.0573002	0.493251	0.316985	0	0.3012	0.327505	0.0237773	0.558529	0.160997	0.178927	0.937811	0.177324	0.395594	1.07644
Prolactin	0.881341	0.157697	0.356907	0.324874	1.03222	1.24481	1.17421	1.49267	1.2251	0.0138637	0.349152	0.426126	0.831685	1.67146	0.96295	1.08221	1.45714
P-Selectin	3.53356	0.0706399	0.71593	0.623273	0.463371	3.31991	2.56517	2.74302	2.08225	0	0.297739	0.646477	1.39213	1.55792	4.03492	5.13165	1.05339
RAGE	0	0.0751711	0.0460387	0.0609474	0.186205	0	0.769681	0.523312	0.539436	0.0918662	0.532397	0.147852	0.145152	1.45349	0.154686	0.500522	2.07829
RANTES	0.908283	0.0664926	0.187037	0.18338	0.534002	0.696238	1.33758	1.043	0.723534	0.745829	0.510634	0.242922	0.547716	1.40663	0.181966	0.682242	1.41095
RELM beta	0.988505	0.0593057	0.302827	0.273245	0.931022	1.65417	1.2137	2.37248	1.12778	0.0175571	0.277284	0.222141	0.317104	0	0.449727	0.696531	0
Resistin	0	0	0.0522339	0.0667406	0.170334	0.300315	0	0.331323	0	0.0946041	0	0.0789358	0.0953081	0	0.124479	0.219539	0
S100A10	0	0.0592322	0.0315159	0	0	0	0	0.253293	0	0.0143456	0	0.0654824	0.0837805	0	0.0537692	0	0
SCF	0	0	0.0395128	0.0477673	0.162676	0	0	0.273021	0	0	0	0.0592547	0.0655018	0	0.068176	0	0
SCF R / c-kit	0.611446	0.101257	0.0525434	0.0616213	0.17862	0	0	0.410749	0	0.0809815	0.459323	0.118742	0.125172	0.623337	0.121848	0.259444	0.939925
SDF-1	0.47772	0	0.0949645	0.112802	0.359707	0.57876	0.993738	0.582008	0.683901	0.171932	0.243827	0.110972	0.120701	0.657	0.15355	0.312261	0.865974
Serum Amyloid A1	0	0.0593836	0.0317365	0	0	0	0	0.289896	0	0	0.229356	0.0577811	0.10853	0	0.0878607	0	0
Shh-N	0	0.103742	0.0498601	0.0575635	0.183548	0	0	0.342382	0	0.157674	0.445668	0.112244	0.12091	0.762375	0.113271	0.237357	1.0282
SIGIRR	0	0.0847871	0.034877	0.0463149	0.162084	0	0	0.322697	0.27261	0.869271	0.388717	0.101802	0.16432	0.606484	0.0897182	0.216948	0
SLPI	0.574057	0.181403	1.02748	0.979147	1.02351	2.9556	2.00962	3.30669	2.31164	0.0762329	1.02789	1.2521	2.01649	1.27263	3.58308	3.03183	1.91953
Soggy-1	1.57649	0.14035	0.710292	0.61515	0.954078	3.00513	2.32193	2.41763	2.01792	0	0.267554	0.679294	1.05303	1.60198	3.87247	4.62854	1.44938
SPARC	1.57923	0.229747	0.6722	0.731793	0.947541	3.828	2.44665	2.44443	2.42575	0.0193714	0.294334	0.712714	1.39353	1.22044	3.62265	4.49382	1.37406
Spinesin Ectodomain	0	0.0689898	0.0396257	0.0617279	0	0	0	0.302635	0.353362	0.0215301	0.266743	0.10097	0.180587	0.701255	0.120499	0.226849	0.846001
TACI / TNFRSF13B	0	0.0847445	0.0526547	0.0811651	0.23749	0.370932	0.747889	0.403748	0.916035	0.0206135	0.336598	0.139876	0.412604	0.883611	0.138252	0.768883	0.988092
TARC	0	0.0874526	0.0623162	0.0708262	0.19981	0.300527	0	0.353514	0.275607	0.158759	0.533619	0.183019	0.120498	0.645193	0.239248	0.257635	1.46144
TCA-3	1.1714	0.351857	2.55826	0.546087	1.21217	3.48106	2.9877	2.55037	1.47479	0.0156185	0.264333	0.487407	0.780424	1.34336	4.09875	3.57514	1.71079
TCCR / WSX-1	0.535837	0.127896	0.266637	0.251875	0.750313	2.05636	1.49322	1.75747	0.929867	0	0	0.258737	0.516745	0.707047	2.18436	1.85362	1.15585
TECK	0	0.0958312	0.0369899	0.0491064	0	0	0	0	0	0.0307555	0.20977	0.0780628	0.112048	0	0.0573257	0	0
TFPI	0	0.0231274	0.0538811	0.05824	0.162962	0.320955	0	0.344019	0	0	0	0.0714555	0.0951569	0	0.127684	0	0
TGF-beta 1	0	0.0471496	0.0326514	0	0	0	0	0	0	0.0124097	0	0	0.0899159	0	0	0	0
TGF-beta 2	0	0	0.0257682	0	0	0	0	0	0	0	0	0	0	0	0	0	0
TGF-beta 3	0	0	0.0858556	0.0654852	0.171402	0	0	0.258494	0.295611	0	0	0.11364	0.0937614	0.714311	0.101348	0.211472	0
TGF-beta RI / ALK-5	0	0	0.0263205	0	0	0	0	0	0	0.0163925	0.20203	0.0628353	0.0824317	0.644112	0.0584666	0.165743	0
TGF-beta RII	3.00545	0.424731	1.05528	0.942747	1.3764	5.20331	3.37061	3.85724	3.3383	0.0164795	0.282814	1.0848	1.86676	1.64414	6.08106	7.77134	1.80424
Thrombospondin	0.653251	0.0432	0.179692	0.16804	0.246404	0.464409	0.658802	0.504661	0.650434	0.0335735	0.270771	0.403297	0.242974	1.09461	0.37214	0.555237	0.734396
Thymus Chemokine-1	0.431861	0.128921	0.0688053	0.0756052	0.179158	0.315921	0	0.695909	0.552796	0.0655946	0.518183	0.126507	0.142418	1.21678	0.325684	0.432741	0.986285
Tie-2	0	0.0717212	0.0268817	0	0	0	0	0	0.267389	0	0	0.0542732	0.11929	0	0.0546664	0	0
TIMP-1	0	0	0.0487748	0.0506609	0	0	0	0.302255	0.324699	0	0.203802	0.108076	0.110497	0.799877	0.120361	0.245739	0
TIMP-2	0.490399	0.214317	0.236762	0.210723	0.519469	1.04294	0.984978	0.534345	0.291555	0.123252	0.204132	0.198128	0.203865	0.693886	0.59401	0.53291	0.723183
TIMP-4	0	0.0626774	0.0479107	0.0774325	0.186341	0.324635	0	0	0	0.0149932	0	0.0523733	0.069964	0	0.106149	0	0
TL1A / TNFSF15	0	0.0587488	0.0276374	0	0	0	0	0	0	0.107685	0	0.0631292	0.166296	0	0	0	0
TLR1	0	0.0568165	0.0325617	0	0	0	0	0	0	0.0120309	0	0	0.126817	0	0	0	0
TLR2	0.762792	0.197118	0.931633	0.860439	1.32288	5.39023	2.94095	3.56253	2.18061	0.0150015	0.231802	0.903073	1.33579	1.24144	5.13729	4.94967	1.43914
TLR3	0	0	0.0299796	0	0	0	0	0	0	0.0140269	0	0.0531298	0.120153	0	0	0	0
TLR4	0	0.0759447	0.0357383	0.0485351	0	0	0	0	0	0.0289033	0.250869	0.0801588	0.121041	0	0.0706732	0.182434	0.786648
TMEFF1 / Tomoregulin-1	0	0.0731066	0.0281325	0	0	0	0	0	0	0	0	0.0552169	0.124866	0	0	0	0
TNF RI / TNFRSF1A	0	0.0743017	0.0458298	0.0537767	0.170038	0	0	0	0.317324	0.763967	0.460008	0.119143	0.185001	0.769664	0.0921463	0.276635	0.783907
TNF RII	0	0.076084	0.0836057	0.0866615	0.214771	0.342006	1.12407	2.02469	0.568462	0.744805	0.261681	0.197054	0.376087	1.5956	0.175937	0.30624	1.06792
TNF-alpha	0	0.0563022	0.0312828	0.0474088	0	0	0	0	0.299998	0.0536848	0	0.0576625	0.177273	0	0.0529118	0	0
TNF-beta / TNFSF1B	1.27382	0.1039	0.35453	0.353014	0.598274	1.76308	1.7372	1.72839	1.37413	0	0.268028	0.359353	0.713719	1.05713	1.98137	2.37457	1.00319
TPO	0	0.0914065	0.0505411	0.0857618	0.167984	0	0	0.28815	0.36145	0.0588933	0.402114	0.0887349	0.139694	0.683809	0.158578	0.335818	0
TRAIL / TNFSF10	0.698805	0.0958754	0.0346851	0.0581744	0	0	0	0.252854	0.403073	0.021706	0.44373	0.0852063	0.179182	0.670139	0.0724393	0.208602	0.755972
TRAIL R2 / TNFRSF10B	0.45862	0.0481171	0.0402422	0.0513808	0.175545	0	0.899209	0.84764	0	0.0462108	0.312923	0.124211	0.0694877	0.600215	0.142292	0.213866	1.18313
TRANCE / TNFSF11	0.638116	0.0673873	0.0670831	0.0631992	0.178003	0	0	0.311676	0	0.0821104	0.794747	0.150172	0.0805186	0	0.163389	0.186197	0.898748
TREM-1	0	0.0480401	0.0278156	0	0	0	0	0	0	0.0118861	0	0	0.121054	0	0	0	0
TROY	0	0.0592112	0.0461223	0.0513543	0	0	0	0	0	0	0	0.0511233	0	0	0.0522589	0	0
TSLP	0	0.0736628	0.0541766	0.053474	0	0	0	0.259908	0	0.0277052	0.277057	0.0950423	0.100478	0	0.139072	1.3	0.805248
TSLP R	0	0.0695335	0.0792674	0.0908207	0.211655	0.394492	0	0.34292	0	0.0141653	0	0.075231	0.12491	0	0.146817	0.194905	0
TWEAK / TNFSF12	0	0.0906396	0.0507344	0.065692	0.168917	1.11742	0	0.281102	0	0.0460489	0.333719	0.112245	0.111891	0	0.119497	0.346801	0.87369
TWEAK R / TNFRSF12	0.398665	0.129279	0.261264	0.250168	0.358643	1.39689	1.30518	1.03572	0.838054	0.0140236	0.214075	0.26395	0.485466	0.67656	1.0703	1.16412	0.703209
Ubiqultin	0	0.0768967	0.0506564	0.0571317	0	0	0	0	0	0.0858448	0	0.0587317	0.123345	0	0.0741264	0	0
uPAR	0	0.0877343	0.0610164	0.0698761	0.171622	0.297051	0.650359	0.323822	0.332235	0.0266494	0.36379	0.112896	0.129887	0.911979	0.224834	0.337431	0.78935
Urokinase	0.471783	0.0544486	0.197481	0.179833	0.525479	0.859848	1.46391	0.596509	0.680744	0	0.237082	0.163673	0.267029	0.96933	0.437432	0.764237	0.98154
VCAM-1	0.707623	0.0712965	0.207579	0.187914	0.363667	0.805788	1.0065	1.03736	0.784582	0.0153405	0.527806	0.237401	0.350679	1.18623	0.633186	0.826593	1.08553
VE-Cadherin	2.22244	0.0629509	0.183986	0.177439	0.482799	0.87728	1.3003	0.838654	0.752877	0.0177156	1.43234	0.144461	0.343542	1.06382	0.585487	1.10518	0.90099
VEGF	0	0	0.0312267	0.0485515	0.171825	0	0	0.266111	0.369945	0	0.215777	0.0667071	0.0870531	0.697568	0.06391	0.200028	0.735038
VEGF R1	0	0	0.0269087	0	0	0	0	0	0	0	0	0	0	0	0	0	0
VEGF R2	0	0.0810473	0.0531868	0.064253	0.215465	0.318734	0.727787	0.410199	0	0.0718067	0.407166	0.149317	0.0693692	0.691874	0.151056	0.263251	1.24843
VEGF R3	0	0.0505251	0.0412858	0	0	0	0	0.304855	0	0.0248632	0.203777	0.11667	0	0	0.0788614	0.169332	0.766378
VEGF-B	1.31144	0.206105	0.322065	0.293508	0.733991	2.46769	1.61708	1.49297	0.968398	0.015777	0.200522	0.335061	0.492941	0.843053	2.67115	2.65035	0.843055
VEGFC	0	0.100048	0.0466808	0.0548711	0.987691	0	0	0.283647	0	0.0136856	0.233795	0.0788125	0.0843468	0.777377	0.0717989	0.16428	1.10476
VEGF-D	0.51315	0.0603176	0.485177	0.430883	0.173935	2.04479	1.93423	1.11654	1.07998	0.0149555	0.290884	0.424153	0.602418	0.629431	2.11552	1.97746	0.684552
WIF-1	0	0	0.0392483	0.0523227	0.162025	0	0	0.295071	0	0	0	0.085864	0.0901412	0	0.0802036	0.187945	0.691604
WISP-1 / CCN4	0.920216	0.202891	0.412006	0.363902	0.705499	2.20698	1.91475	1.58493	1.08014	0.0147865	0.221114	0.398048	0.69626	1.04581	2.70433	2.90561	0.947689

## Sheet: OOvYY
	Y1	Y2	Y3	O1	O2	O3	O4
6Ckine	0.0625154	0.0358047	0.0521426	0.0120662	0	0.0641712	0.0906231
Activin A	0.0512181	0.0794236	0.0828276	0.344376	0.366803	0.172211	0.346614
Activin C	0.0730873	0.0293404	0.048892	0	0.230429	0.0625302	0.147156
Activin RIB / ALK-4	0	0.0401322	0.0697812	0	0.330978	0.0851463	0.195541
Adiponectin / Acrp30	0.159001	0.0389764	0.0713463	0.0220023	0.410515	0.0839872	0.287581
AgRP	0.101341	0.0870736	0.111409	0	0.30532	0.159008	0.415684
ALCAM	0.0585327	0	0	0.0118141	0.229964	0.0528095	0.166729
Angiopoietin-like 2	0.108145	0.0236594	0.0521855	0.0293527	0.340457	0.119626	0.154871
Angiopoietin-like 3	0.154309	0.0448297	0.0802058	0.0192027	0.487426	0.150833	0.427183
AR (Amphiregulin)	0.0984012	0	0.0756005	0	0.265748	0.0678146	0.153168
Artemin	0.117797	0.0501741	0.0692923	0.43822	0.600631	0.122311	0.295322
Axl	0.0722268	0.0423243	0.0530165	0.722891	0.567375	0.276348	0.320016
b FGF	0.348143	0.195997	0.49311	0.145348	0.338923	0.893826	1.04441
B7-1/CD80	0.0726337	0.0404998	0.0585553	0	0.234321	0.15249	0.189666
BAFF R / TNFRSF13C	0.0991825	0.0450223	0.0553802	0.0323931	0.27751	0.0856549	0.225502
BCMA / TNFRSF17	0.0911525	0.0328306	0.046516	0.0150239	0	0.0886472	0.142748
beta-Catenin	0.0384786	0.0305259	0.050228	0	0.225373	0.0601208	0.119797
BLC	0.0760331	0.0464685	0.0717158	0.0152598	0.295671	0.133432	0.185938
BTC (Betacellulin)	0.0624403	0.0465523	0.0643399	0	0.293651	0.129551	0.406835
Cardiotrophin-1	0.128583	0.0584106	0.0788502	0.667222	0.542425	0.226268	0.456923
CCL1 / I-309 / TCA-3	0.366826	1.91534	0.640013	0.019214	0.395391	0.672538	1.30988
CCL28	0.476677	1.20129	0.988566	0.0198773	0.451467	1.55612	1.88528
CCL4 / MIP-1 beta	0.14307	0.0637977	0.0876194	0.159605	1.23035	0.196802	0.220412
CCL7 / MCP-3 / MARC	0	0.0280139	0.0511697	0	0.201123	0.0889676	0.0706848
CCL8 / MCP-2	0.07229	0.127852	0.13489	0.122725	0.415639	0.204346	0.177635
CCR10	0.0541933	0.0269828	0.0548989	0	0	0	0.127896
CCR3	0.0798119	0.0331185	0.0506827	0.0778118	0.369294	0.10034	0.17416
CCR4	0.0980972	0.170018	0.0707657	0.0121091	0.229263	0.173533	0.0838372
CCR6	0.0945984	0.183366	0.299813	0.0161249	0.332432	0.253693	0.373238
CCR7	0.0905552	0.0408011	0.0524376	0.0141132	0.207403	0.0999582	0.120196
CCR9	0.0930752	0.151778	0.104677	0.0126236	0.211935	0.113625	0.412232
CD11b	0.156491	0.0701951	0.105533	0.0239771	0.236193	0.0874133	0.176607
CD14	0.0796635	0.0349416	0.0573683	0.0152072	0.250235	0.0906899	0.213251
CD27 / TNFRSF7	0.0731999	0	0.0480327	0.0145265	0.208689	0.0513019	0.159713
CD27 Ligand / TNFSF7	0.158843	0.0709967	0.102268	0.420517	0.665707	0.220227	0.409093
CD30	0.155848	0.051578	0.081235	0.179741	0.545517	0.106807	0.526961
CD30 L	0.0960355	0.0316904	0.0694187	0.0135309	0.302529	0.0938847	0.159155
CD40	0.0827386	0.055139	0.0526173	0.358231	0.383845	0.130405	0.185485
CD40 Ligand / TNFSF5	0.093405	0.084555	0.0862016	0.0406517	0.439883	0.147698	0.380727
Cerberus 1	0	0	0	0	0	0	0
Chordin-Like 2	0.082214	0.0417557	0.0645931	0.0228112	0.32617	0.0971261	0.231555
Coagulation Factor III / Tissue Factor	0	0.0243767	0	0	0.260972	0.0632297	0.110214
Common gamma Chain / IL-2 R gamma	0.515744	0.955121	0.874055	0.0195	0.369087	0.950877	1.63199
CRG-2	0.10505	0.0866476	0.0826435	0.0294922	0.411908	0.175337	0.196101
Cripto	0.115113	0.0534269	0.0728611	0.0230402	0.36617	0.104463	0.4731
Crossveinless-2	0.0673282	0.0338038	0.0586243	0	0.24188	0.0737115	0.247557
CRP	0.9174	1.2395	1.27194	0.648292	0.482059	1.73471	2.61029
Cryptic	0.298804	0.038295	0.0680865	0.0679105	0.279362	0.0985703	0.225531
Csk	0.0927372	0.0619263	0.0759198	0.237696	0.369701	0.138357	0.122891
CTACK	0.435229	1.04884	0.82252	0.0274576	0.700935	1.14984	2.12976
CTLA-4 / CD152	0.159363	0.0696003	0.185555	0.0205762	0.309138	0.120949	0.260641
CXCL14 / BRAK	0.172016	0.356204	0.503157	0	0.234939	0.362127	0.945188
CXCL16	0.11284	0.0697386	0.103187	0.0847365	0.577341	0.175931	1.20483
CXCR2 / IL-8 RB	0.101266	0.0549821	0.0768517	0.0567275	0.40563	0.135174	0.230003
CXCR3	0.0864213	0.0428094	0.0536621	0.0275876	0.258846	0.0876366	0.23777
CXCR4	0.0629357	0.0359283	0.053118	0	0	0	0.135213
CXCR6	0.282404	0.692485	0.661887	0.0157425	0.348628	0.567466	1.25311
DAN	0.0781963	0.0402615	0.0641697	0.0178227	2.83929	0.116419	0.128628
Decorin	0.112321	0.0490232	0.0684111	0.0319568	4.69971	0.138054	0.340314
DKK-1	0	0.0307447	0.0486304	0	0.245866	0.0619516	0.0838688
Dkk-3	0.0901524	0.0636364	0.078123	0.0848711	0.519907	0.224225	0.260657
Dkk-4	0.0915091	0.0350352	0.0660981	0	0.21114	0.0730226	0.30383
DPPIV / CD26	0.0887052	0.0488168	0.0636487	0.0928592	0.665557	0.210976	0.221639
DR3 / TNFRSF25	0.0852953	0	0.0535266	0.0143427	0	0.058472	0.218273
Dtk	0.118002	0.106531	0.188055	0.685402	2.39576	0.305585	0.479082
EDAR	0.112295	0.0762794	0.106213	0.0642932	0.683285	0.213664	0.409144
EGF R	0.0905257	0.034902	0.0664711	0.438805	0.352157	0.160403	0.174283
EG-VEGF / PK1	0.285558	0.714407	0.736603	0.0177387	0.829882	0.811767	1.04756
Endocan	0.103404	0.0542963	0.0752968	0	0.331399	0.160728	0.162113
Endoglin / CD105	0.112764	0.429162	0.381886	0.0820848	0.257902	0.491775	0.62948
Endostatin	0.461546	0.106742	0.0583396	0.0178322	0.5421	0.122175	0.171861
Eotaxin	0.0454293	1.22874	1.00302	0	0.453705	1.14779	2.08159
Eotaxin-2	0.197255	3.08938	0.793166	0.0610495	0.624133	0.475355	0.956811
Epigen	0.104815	0.0257645	0	0.0338794	0	0	0.0651656
Epiregulin	0.11435	0.0498976	0.0608726	0.0490944	0.371438	0.121354	0.13016
Erythropoietin (EPO)	0.0984934	0.157706	0.0755293	0.101389	0.662763	0.779902	0.376656
E-Selectin	0.174505	0.0544344	0.077184	0.393855	0.647591	0.206371	0.273908
FADD	0.139956	0.100288	0.151529	0.463662	0.502915	0.175116	0.274409
FAM3B	0.116596	0.031646	0.0769401	0.016371	0.241388	0.0887098	0.14054
Fas Ligand	0.028684	0.0361291	0	0.250854	0.227863	0.167861	0.0831367
FCrRIIB / CD32b	0.0765365	0.0479621	0.0711039	0.034135	0.365673	0.097665	0.170697
FGF R3	0.0755619	1.34132	0.131921	0.0190798	0.274168	0.190623	0.337471
FGF R4	0	0.0396025	0.0667432	0	0.224014	0.0691128	0.0780119
FGF R5 beta	0.103898	0.035963	0.0519569	0.053751	0.427836	0.0869473	0.146418
FGF-21	0.0380351	0.0415575	0.0491918	0.316145	0.266539	0.132373	0.157372
Fit-3 Ligand	0.0347219	0.0461579	0.0466075	0	0.214391	0.0933512	0.0743887
FLRG (Follistatin)	0.0990958	0.0520971	0.0624522	0.0377801	0.552436	0.12365	0.139773
Follistatin-like 1	0.127708	0.59984	0.332568	0	0.558759	0.403473	0.886179
Fractalkine	0.085377	0.0348787	0.0574592	0.0184924	0.376835	0.180788	0.203121
Frizzled-1	0.0857286	0.0366402	0.0648926	0.547771	0.544156	0.178838	0.129769
Frizzled-6	0.209612	0.637635	0.699369	0.0149785	0.28296	0.783364	1.47021
Frizzled-7	0.1081	0.0868785	0.204331	0.993157	0.556989	0.357604	0.245614
Galectin-3	0.171667	0.0562897	0.053451	0.0939754	0.346417	0.191799	0.193705
G-CSF	0.102844	0.0646618	0.091576	0.415626	0.491731	0.222996	0.221747
GDF-1	0.0968819	0.0339257	0.051935	0.0281958	0	0	0.100255
GDF-3	0.0809317	0.0674575	0.0668165	0.0445135	0.37088	0.183268	0.131433
GDF-5	0.128152	0.402079	0.32084	0.343033	0.695834	0.257176	0.382943
GDF-8	0.409871	1.09826	1.10809	0.0205796	0.347978	1.08453	1.68624
GDF-9	0	0.0248235	0	0	0	0	0
GFR alpha-2 / GDNF R alpha-2	0.0832658	0.0355121	0.0524239	0.0148832	0.203812	0.0559502	0.140773
GFR alpha-3 / GDNF R alpha-3	0.0877352	0.0352706	0.0592429	0.0148415	0.224525	0.06617	0.148109
GFR alpha-4 / GDNF R alpha-4	0.128513	0.127071	0.17968	0.204708	1.83363	0.289281	0.228198
GITR	0.102308	0.0509584	0.0786134	0.712662	0.56514	0.20255	0.164761
GITR Ligand / TNFSF18	0.102447	0.0304937	0.061974	0.0148253	0.24111	0.08269	0.177498
Glut2	0.302161	1.02618	0.717994	0	0.237128	0.911522	1.68388
GM-CSF	0.161192	0.063912	0.102229	0.200243	0.477331	0.183025	0.253477
Granzyme B	0.140099	1.92371	0.0845024	0.0231799	0.569326	0.248068	0.204974
Granzyme D	0.0673306	0.039077	0.0567111	0.303775	1.96834	0.119597	0.175247
Granzyme G	0.0578364	0.0335728	0	0	0	0.0698225	0.0904275
Gremlin	0	0.0370937	0.0573123	0	0.260614	0.0670544	0.0768753
Growth Hormone R	0	0.0449782	0.0681158	0	0.286749	0.0781678	0.0927616
HGF R	0.106921	0.0681722	0.0695097	0.0400764	0.470502	0.205223	0.1132
HGF	0	0.0530271	0.0787609	0	0.319985	0.113316	0.1152
HVEM / TNFRSF14	0.0853155	0.0507439	0.0705233	0.0162019	0.220125	0.0901014	0.121164
ICAM-1	0.507582	0	0	0.0188823	0	0	0
ICAM-2 / CD102	0.0911487	1.2037	1.02335	0.0162112	0.52221	1.15111	1.92695
ICAM-5	0.109943	1.45631	0.969027	0.0188537	0.349583	0.782582	2.64829
ICK	0.0850698	0.201647	0.0622804	0.0275271	0.30904	0.206689	0.289907
IFN-alpha / beta R1	0.103145	0.753929	0.873233	0.0165702	0.259035	0.796627	1.57974
IFN-alpha / beta R2	0.129851	0.0309633	0.0616298	0.0348772	0.240273	0.0812497	0.130279
IFN-beta	0.0809401	0.0271781	0.0541214	0.0257899	0.385816	0.0680603	0.0992298
IFN-gamma	0.0720781	0.605744	0.616893	0.058458	0.245146	0.695078	1.29296
IFN-gamma R1	0.267639	0.154739	0.126044	0.0149686	0	0.228753	0.169807
IGFBP-1	0.278978	0.0336929	0.0514746	0.0172708	0.239511	0	0.145174
IGFBP-2	0.223553	0.120848	0.139293	0.0188898	0.506693	0.377193	0.367665
IGFBP-3	0.308367	0.0614856	0.124187	0.0172376	0.520436	0.188159	0.161201
IGFBP-5	0.0773224	0.806613	0.713147	0.0132896	0.592094	0.913743	0.879074
IGFBP-6	0	0.599586	0.603109	0	0.211747	0.634991	0.75638
IGFBP-rp1 / IGFBP-7	0.0501945	0.758342	0.916653	0	0.247915	0.996327	1.41138
IGF-I	0.125195	0.0929907	0.103261	0.649713	0.2087	0.132793	0.236939
IGF-II	0.124869	0.0344946	0.0528599	0.0414196	0.21542	0.0696895	0.0769988
IL-1 alpha	0.338258	0.0300932	0.0566361	0.0153304	0	0.0661199	0.105545
IL-1 beta	0.0668069	1.44484	1.08273	0.422197	0.564578	1.01688	2.83821
IL-1 R4 / ST2	0.489276	0.189069	0.064763	0.0219517	0.398547	0.21099	0.344318
IL-1 R6 / IL-1 R rp2	0.0746709	0.656542	0.840614	0.0121093	0.436832	0.850212	1.80744
IL-1 R9	0.0549306	0.0349316	0.0603959	0	0.269915	0.090117	0.159
IL-1 RI	0.4818	0.0245498	0	0.0154552	0	0	0
IL-1 RII	0.0945249	0.560726	0.552035	0.0596364	0.223847	0.500629	0.664044
IL-10	0.119626	0.216623	0.192962	0.118179	0.545541	0.2957	0.163588
IL-10 R alpha	0	0.0496321	0.0783703	0.218923	0.304126	0.0898179	0.282417
IL-11	0.696729	0.0313972	0.0561788	0.0179833	0.208245	0.185419	0.119214
IL-12 p40/p70	0.131428	1.36599	1.4213	0.0637367	0.39794	2.04572	2.58925
IL-12 p70	0.288784	0.052269	0.0852056	0.0211975	0.25041	0.123029	0.298497
IL-12 R beta 1	0.0488167	0.179033	0.276296	0.0154341	0.287544	0.154337	0.286412
IL-13	0	0.0428211	0.0589681	0.0147542	0.201943	0.0728405	0.103541
IL-13 R alpha 2	0.0897511	0.0958092	0.092424	0.0312622	0.398832	0.195499	0.193825
IL-15	0.0391598	0.0575557	0.0721328	0.0252175	0.252431	0.139655	0.077164
IL-15 R alpha	0.151923	0.0366249	0.0475859	0.0163961	0.244316	0.171179	0.0695623
IL-16	0.224501	0.740047	0.534626	0.0176809	0.259217	0.588488	0.960572
IL-17	0.0737238	1.20838	0.860951	0.063545	0.383244	1.19767	1.87556
IL-17BR	0.0875812	0.142232	0.160506	0.0189268	0.228371	0.158479	0.440096
IL-17C	0	0.04412	0.056967	0.0180253	0.337965	0.170345	0.107679
IL-17D	0.0830412	0.0267017	0	0.0133499	0	0.0568469	0.159256
IL-17E	0.108171	0.0400317	0.0636257	0.0503113	0.258275	0.0943306	0.149741
IL-17F	0.0311903	0.0522213	0.0774397	0	0.613677	0.185855	0.14276
IL-17R	0.317995	0.0291567	0.0554264	0.0213805	0	0.0871393	0.122606
IL-17RC	0.110931	1.14679	1.34866	0.0301935	0.398388	1.27947	2.75649
IL-17RD	0.0627229	0.0484506	0.0675903	0.0121255	0.199705	0.118088	0.151541
IL-18 R alpha/IL-1 R5	0.0317441	0.0301842	0	0.826501	0.203064	0.089991	0
IL-2	0.0812236	0.0603637	0.0670347	0.0131681	0.47167	0.211775	0.161523
IL-2 R alpha	0.0797087	0.0303792	0.0494256	0.0209791	0	0.0531412	0.156633
IL-2 R beta	0.0901345	0.0619954	0.0480488	0.0216436	0.238624	0.123777	0.124129
IL-20	0.0569269	0.0323035	0.0527622	0.0341649	0.232218	0.0737366	0.214447
IL-20 R alpha	0.0961507	0.0691079	0.0804302	0.36179	0.320582	0.165998	0.192308
IL-21	0.0341025	0.0417835	0.0534907	0	0.285028	0.115852	0.122014
IL-21 R	0.0519516	0.0400387	0.0590397	0.515458	0.225989	0.0860325	0.0723849
IL-22	0.101078	0.0423069	0.0611308	0.0484047	0.423768	0.116146	0.0893945
IL-22BP	0.0754345	0.0557766	0.0684798	0.0134104	0.477232	0.131571	0.133871
IL-23	0.0412269	0.0322835	0.0532749	0.0124218	0.215178	0.0697245	0.143507
IL-23 R	0.396649	0.0276576	0	0.0190627	0	0.0633106	0.0864609
IL-24	0.0812903	1.134	0.881269	0.0132643	0.511374	1.1653	2.03174
IL-27	0.376089	0.0351701	0.0533676	0.0226603	0	0.0840177	0.093753
IL-28 / IFN-lambda	0.32088	1.25887	1.12146	0.0216559	1.08759	1.36076	2.51287
IL-3	0.0911214	0.942456	1.03586	0.0536832	0.328082	1.23199	2.26192
IL-3 R alpha	0.0367403	0.0504676	0.0729547	0	0.204847	0.0869106	0.18722
IL-3 R beta	0.132288	0.20561	0.211273	0.0323322	0	0.175055	0.290709
IL-31	0.18588	0.0579174	0.0742172	0	0.400373	0.131873	0.179057
IL-31 RA	0	0.370014	0.359849	0	0.228412	0.436155	0.736685
IL-4	0.0311105	0.0402735	0	0.440888	0	0.0663402	0
IL-4 R	0.0909926	0.0634357	0.0680101	0	0.358128	0.185625	0.205387
IL-5	0.160773	0.0356246	0.0669252	0.193319	0.219038	0.0798416	0.156601
IL-5 R alpha	0.088552	0.0766876	0.113112	0	0.437452	0.113642	0.412977
IL-6	0.0903273	0.0367581	0.0594453	0.0703157	0.224932	0.0685653	0.256361
IL-6 R	0	0.0294121	0.0537698	0	0.267132	0.0592274	0.239478
IL-7	0	0.0647033	0.0994967	0	0.387169	0.113678	0.127535
IL-7 R alpha	0.033903	0.0453003	0.0737802	0	0.304068	0.0877913	0.10267
IL-9	0.179209	0.0636865	0.100584	0.0370644	0.318004	0.144096	0.137704
IL-9 R	0.276897	0.0526826	0.0729636	0.314319	1.67752	0.121332	0.199553
Insulin	0.0415588	0.530648	0.206431	0.0130745	1.43316	0.326576	0.833013
Integrin beta 2 / CD18	0.0561137	0.0405835	0.0461423	0.0236013	0	0.090838	0.106916
I-TAC	0	0.0334587	0	0	0	0.0855745	0.0681939
KC	0	0.0288775	0	0.0149438	0	0.0773642	0.0605597
Kremen-1	0.0843243	0.04156	0.0587617	0.0193771	0.239171	0.0977229	0.0931908
Kremen-2	0.0722684	0.0365897	0.0529152	0.0134303	0.202706	0.0666375	0.115606
Lefty-1	0.0890961	0.1973	0.121827	0.0172417	0.547545	0.28119	0.732927
Leptin R	0.102514	0.0420995	0.0589519	0.0313644	0.295886	0.121623	0.101866
LEPTIN(OB)	0	0.0412067	0.0551707	0	0.351324	0.0912127	0.0920582
LIF	0.0952807	0.02641	0	0	0	0.060204	0.0874936
LIGHT / TNFSF14	0	0.296308	0.297752	0.014288	0.257273	0.332253	0.531165
LIX	0.217846	0.0378663	0.062866	0.0138206	0.269318	0.134363	0.113525
LRP-6	0.0980463	0.84179	0.766789	0	0.412047	0.999571	1.94726
L-Selectin	0.112087	0.1195	0.136294	0.339192	0.251401	0.127761	0.399627
Lungkine	0.0852936	0.373944	0.320656	0	0	0.273511	0.388103
Lymphotactin	0.0667519	0.0308806	0	0.0170885	0	0.0565321	0.117017
Lymphotoxin beta R / TNFRSF3	0.30381	0.587507	0.522245	0.0155197	0.271747	0.542715	1.04571
MAdCAM-1	0.0766855	0.744737	0.585437	0.581252	0.333491	0.571204	1.02078
MCP-1	0.0456514	0.0530074	0.0476381	0.0210732	0.37016	0.148501	0.135734
MCP-5	0.159024	0.0398969	0.0515828	0.0235183	0	0.0591954	0.218794
M-CSF	0.107571	2.52137	0.10473	0	0.377618	0.225977	0.397228
MDC	0.122293	0.124339	0.118129	0.086515	0.59818	0.216181	0.360868
MFG-E8	0.0773895	0.038459	0.0621171	0.0294055	0.31357	0.134457	0.107964
MFRP	0.087121	0.0292687	0.0469379	0.0141297	0.258673	0.0695392	0.205739
MIG	0.0328111	0.044138	0.0755523	0	0.367696	0.104387	0.150107
MIP-1 alpha	0	0.040096	0.0718297	0	0.393253	0.118941	0.165685
MIP-1 gamma	0	0.0450536	0.0585705	0.64419	0.471117	0.266335	0.249205
MIP-2	0.0795676	0.141603	0.156111	0	0	0.151691	0.190975
MIP-3 alpha	0	0.0332784	0	0.482547	0.330076	0.122482	0.0800901
MIP-3 beta	0	0.0445839	0.0598994	0.0258348	0.222051	0.0921875	0.0706508
MMP-12	0.0268127	0.0239953	0	0	0	0	0
MMP-14 / LEM-2	0.0663715	0.0396114	0.0571032	0.0241831	0	0.0565588	0.127302
MMP-2	0	0.133183	0.131381	0	0	0.102779	0.153569
MMP-24 / MT5-MMP	0.0395192	0.0417461	0.048869	0.0134992	0.235943	0.0822365	0.0804447
MMP-3	0.0656502	0.040342	0	0.0458299	0.361425	0.0674239	0
MMP-9	0	0.0456654	0.05854	0	0	0.0688623	0.128589
Neuregulin-3 / NRG3	0.0760842	0.0332549	0.0501303	0.0137616	0.216835	0.064702	0.154057
Neurturin	0.0826686	0.0355318	0.0550827	0.0175296	0.241626	0.0815543	0.122346
NGF R / TNFRSF16	0.0722567	0.0272882	0	0.0126478	0	0.061925	0.154986
NOV / CCN3	0.111709	0.0530855	0.0677837	0.0679491	0.500843	0.14713	0.251217
Osteoactivin / GPNMB	0.173644	0.348824	0.357953	0.017157	0.285395	0.410323	0.870594
Osteopontin	0.0793351	0.0907547	0.0924625	0.0168061	0.360711	0.113197	0.133776
Osteoporotegerin	0.0694345	0.0869033	0.079406	0.173904	0.615559	0.190952	0.104705
OX40 Ligand / TNFSF4	0.0739356	0.0358622	0	0.0265513	0.240508	0.0750784	0.123691
PDGF C	0.0886092	0.181813	0.155933	0.571544	0.852273	0.178519	0.231803
PDGF R alpha	0.076668	0.0486076	0.0534826	0.0260432	0.332313	0.0962769	0.0834917
PDGF R beta	0.0941763	0.0719448	0.0557691	0.470117	0.218733	0.102121	0.119364
Pentraxin3 / TSG-14	0.0707638	0.0523925	0.0575699	0	0.362172	0.107832	0.221342
PF-4	0.214233	0.334093	0.290816	0	0	0.195377	0.673418
PlGF-2	0.0853771	1.33756	0.989805	0.216748	0.757827	1.10425	1.64705
Progranulin	0.0826605	0.0634452	0.0573002	0.0237773	0.558529	0.160997	0.178927
Prolactin	0.157697	0.356907	0.324874	0.0138637	0.349152	0.426126	0.831685
P-Selectin	0.0706399	0.71593	0.623273	0	0.297739	0.646477	1.39213
RAGE	0.0751711	0.0460387	0.0609474	0.0918662	0.532397	0.147852	0.145152
RANTES	0.0664926	0.187037	0.18338	0.745829	0.510634	0.242922	0.547716
RELM beta	0.0593057	0.302827	0.273245	0.0175571	0.277284	0.222141	0.317104
Resistin	0	0.0522339	0.0667406	0.0946041	0	0.0789358	0.0953081
S100A10	0.0592322	0.0315159	0	0.0143456	0	0.0654824	0.0837805
SCF	0	0.0395128	0.0477673	0	0	0.0592547	0.0655018
SCF R / c-kit	0.101257	0.0525434	0.0616213	0.0809815	0.459323	0.118742	0.125172
SDF-1	0	0.0949645	0.112802	0.171932	0.243827	0.110972	0.120701
Serum Amyloid A1	0.0593836	0.0317365	0	0	0.229356	0.0577811	0.10853
Shh-N	0.103742	0.0498601	0.0575635	0.157674	0.445668	0.112244	0.12091
SIGIRR	0.0847871	0.034877	0.0463149	0.869271	0.388717	0.101802	0.16432
SLPI	0.181403	1.02748	0.979147	0.0762329	1.02789	1.2521	2.01649
Soggy-1	0.14035	0.710292	0.61515	0	0.267554	0.679294	1.05303
SPARC	0.229747	0.6722	0.731793	0.0193714	0.294334	0.712714	1.39353
Spinesin Ectodomain	0.0689898	0.0396257	0.0617279	0.0215301	0.266743	0.10097	0.180587
TACI / TNFRSF13B	0.0847445	0.0526547	0.0811651	0.0206135	0.336598	0.139876	0.412604
TARC	0.0874526	0.0623162	0.0708262	0.158759	0.533619	0.183019	0.120498
TCA-3	0.351857	2.55826	0.546087	0.0156185	0.264333	0.487407	0.780424
TCCR / WSX-1	0.127896	0.266637	0.251875	0	0	0.258737	0.516745
TECK	0.0958312	0.0369899	0.0491064	0.0307555	0.20977	0.0780628	0.112048
TFPI	0.0231274	0.0538811	0.05824	0	0	0.0714555	0.0951569
TGF-beta 1	0.0471496	0.0326514	0	0.0124097	0	0	0.0899159
TGF-beta 2	0	0.0257682	0	0	0	0	0
TGF-beta 3	0	0.0858556	0.0654852	0	0	0.11364	0.0937614
TGF-beta RI / ALK-5	0	0.0263205	0	0.0163925	0.20203	0.0628353	0.0824317
TGF-beta RII	0.424731	1.05528	0.942747	0.0164795	0.282814	1.0848	1.86676
Thrombospondin	0.0432	0.179692	0.16804	0.0335735	0.270771	0.403297	0.242974
Thymus Chemokine-1	0.128921	0.0688053	0.0756052	0.0655946	0.518183	0.126507	0.142418
Tie-2	0.0717212	0.0268817	0	0	0	0.0542732	0.11929
TIMP-1	0	0.0487748	0.0506609	0	0.203802	0.108076	0.110497
TIMP-2	0.214317	0.236762	0.210723	0.123252	0.204132	0.198128	0.203865
TIMP-4	0.0626774	0.0479107	0.0774325	0.0149932	0	0.0523733	0.069964
TL1A / TNFSF15	0.0587488	0.0276374	0	0.107685	0	0.0631292	0.166296
TLR1	0.0568165	0.0325617	0	0.0120309	0	0	0.126817
TLR2	0.197118	0.931633	0.860439	0.0150015	0.231802	0.903073	1.33579
TLR3	0	0.0299796	0	0.0140269	0	0.0531298	0.120153
TLR4	0.0759447	0.0357383	0.0485351	0.0289033	0.250869	0.0801588	0.121041
TMEFF1 / Tomoregulin-1	0.0731066	0.0281325	0	0	0	0.0552169	0.124866
TNF RI / TNFRSF1A	0.0743017	0.0458298	0.0537767	0.763967	0.460008	0.119143	0.185001
TNF RII	0.076084	0.0836057	0.0866615	0.744805	0.261681	0.197054	0.376087
TNF-alpha	0.0563022	0.0312828	0.0474088	0.0536848	0	0.0576625	0.177273
TNF-beta / TNFSF1B	0.1039	0.35453	0.353014	0	0.268028	0.359353	0.713719
TPO	0.0914065	0.0505411	0.0857618	0.0588933	0.402114	0.0887349	0.139694
TRAIL / TNFSF10	0.0958754	0.0346851	0.0581744	0.021706	0.44373	0.0852063	0.179182
TRAIL R2 / TNFRSF10B	0.0481171	0.0402422	0.0513808	0.0462108	0.312923	0.124211	0.0694877
TRANCE / TNFSF11	0.0673873	0.0670831	0.0631992	0.0821104	0.794747	0.150172	0.0805186
TREM-1	0.0480401	0.0278156	0	0.0118861	0	0	0.121054
TROY	0.0592112	0.0461223	0.0513543	0	0	0.0511233	0
TSLP	0.0736628	0.0541766	0.053474	0.0277052	0.277057	0.0950423	0.100478
TSLP R	0.0695335	0.0792674	0.0908207	0.0141653	0	0.075231	0.12491
TWEAK / TNFSF12	0.0906396	0.0507344	0.065692	0.0460489	0.333719	0.112245	0.111891
TWEAK R / TNFRSF12	0.129279	0.261264	0.250168	0.0140236	0.214075	0.26395	0.485466
Ubiqultin	0.0768967	0.0506564	0.0571317	0.0858448	0	0.0587317	0.123345
uPAR	0.0877343	0.0610164	0.0698761	0.0266494	0.36379	0.112896	0.129887
Urokinase	0.0544486	0.197481	0.179833	0	0.237082	0.163673	0.267029
VCAM-1	0.0712965	0.207579	0.187914	0.0153405	0.527806	0.237401	0.350679
VE-Cadherin	0.0629509	0.183986	0.177439	0.0177156	1.43234	0.144461	0.343542
VEGF	0	0.0312267	0.0485515	0	0.215777	0.0667071	0.0870531
VEGF R1	0	0.0269087	0	0	0	0	0
VEGF R2	0.0810473	0.0531868	0.064253	0.0718067	0.407166	0.149317	0.0693692
VEGF R3	0.0505251	0.0412858	0	0.0248632	0.203777	0.11667	0
VEGF-B	0.206105	0.322065	0.293508	0.015777	0.200522	0.335061	0.492941
VEGFC	0.100048	0.0466808	0.0548711	0.0136856	0.233795	0.0788125	0.0843468
VEGF-D	0.0603176	0.485177	0.430883	0.0149555	0.290884	0.424153	0.602418
WIF-1	0	0.0392483	0.0523227	0	0	0.085864	0.0901412
WISP-1 / CCN4	0.202891	0.412006	0.363902	0.0147865	0.221114	0.398048	0.69626
