# Supplementary material for: Rejuvenation of three germ layers tissues by exchanging old blood plasma with saline-albumin
Source: publisher site journal article supplement (doi:10.18632/aging.103418), 2020-05-30
Supplement: Supplementary file 3 [file aging-v12i10-103418-supplementary-material-SD4.xlsx]

## Sheet: Sheet1
Dataset 2. Human raw proteomics
ID	S1 Pre	S2 Pre	S3 Pre	S1 Post	S2 Post	S3 Post
6Ckine	0.210277	0.140439	0.114287	0.0701508	0.0940698	0.107579
Activin A	0.327608	0.085185	0.0931424	0.0761534	0.106902	0.0603049
Activin B	0.214361	0.149123	0.156013	0.238958	0.166102	0.132814
Activin C	0.0971739	0.0764516	0.0709739	0.0364322	0.10576	0.0590484
Activin RIA / ALK-2	0.216132	0.116111	0.216441	0.0980716	0.236202	0.113207
Activin RIB / ALK-4	0.386665	0.1048	0.122541	0.0530908	0.133595	0.0873558
Activin RII A/B	0.262305	0.10345	0.103318	0.051763	0.0914983	0.0865916
Activin RIIA	0.344711	0.290814	0.453814	1.08496	2.18875	1.03115
Adiponectin / Acrp30	3.7345	2.92589	3.32173	3.33273	5.64091	4.17982
AgRP	0.0817525	0.0690283	0.082218	0.0436845	0.116051	0.0603913
ALCAM	0.327279	0.182641	0.0830354	0.0487714	0.162923	0.17186
Angiogenin	0.52536	0.545528	0.697187	1.39461	1.25722	1.27638
Angiopoietin-1	0.112191	0.269474	0.450983	0.502549	1.35406	0.550942
Angiopoietin-2	0.442048	0.472191	0.891349	2.34103	3.05936	2.8297
Angiopoietin-4	0.194472	0.094856	0.150538	0.039199	0.0829148	0.0663679
Angiopoietin-like 1	0.439821	0.46641	0.704961	1.193	2.27031	1.28136
Angiopoietin-like 2	0.0599555	0.105167	0.139367	0.0877697	0.342813	0.124852
Angiopoietin-like Factor	0	0	0	0	0.0621646	0.0428122
Angiostatin	1.18736	0.858978	1.3488	3.62331	5.90375	4.54623
APJ	0.0708828	0.0558627	0.0881826	0.0314886	0.161902	0.0639829
APRIL	0.574808	0.326951	0.616653	1.39087	3.8716	2.10487
AR (Amphiregulin)	0.266078	0.128135	0.111456	0.0517557	0.124802	0.0729899
Artemin	0	0.0595026	0.0934435	0.033722	0.754065	0.0545772
Axl	0.262682	0.0774985	0.0989657	0.0383834	0.0854769	0.0559633
B7-1 /CD80	0.416238	0.264223	0.138063	0.0391023	0.105832	0.227636
BACE-1	0.129211	0.0571951	0.067503	0.0494809	0.067854	0.0454717
BAFF R / TNFRSF13C	0.126234	0.054809	0.0464717	0.0250626	0.0855285	0.0597647
BAX	0.432178	0.580383	1.07734	1.7545	4.00531	2.59663
BCMA / TNFRSF17	0.0526749	0.0695308	0.0864565	0.050636	0.0916299	0.0684446
BD-1	0.337974	0.439675	0.487449	0.510736	0.647811	0.46803
BDNF	0.751949	1.0513	1.2015	4.57806	4.7127	4.48753
beta-Catenin	0	0.0364695	0.0585074	0.02547	0.0536781	0.0375937
beta-NGF	0.169189	0.140361	0.167492	0.0740394	0.167803	0.108628
BIK	0.251505	0.222848	0.1541	0.0519911	0.200519	0.141236
BLC / BCA-1 / CXCL13	0.266372	0.183622	0.117389	0.0686577	0.237409	0.379306
BMP-15	0.0925008	0.122125	0.101114	0.0386789	0.0939304	0.0728942
BMP-2	0.10547	0.192016	0.168551	0.0653993	1.2699	0.179908
BMP-3	0.116311	0.200931	0.146702	0.110375	0.774334	0.251017
BMP-3b / GDF-10	0.170476	0.0909794	0.0713355	0.0289705	0.139413	0.0729731
BMP-4	0.291413	0.432388	0.282135	0.323167	0.96711	0.661044
BMP-5	0.0879812	0.0645252	0.0936727	0.0454683	0.124002	0.0631479
BMP-6	0.082149	0.195944	0.14402	0.0739147	0.241871	0.154056
BMP-7	0.101326	0.0836843	0.0474818	0.0368283	0.110473	0.0716376
BMP-8	0	0.0664969	0.0960669	0.04025	0.46911	0.0502949
BMPR-IA / ALK-3	0	0.0897957	0.0842098	0.0396598	0.148742	0.07167
BMPR-IB / ALK-6	0.344689	0.244387	0.323539	1.53903	1.41841	1.23472
BMPR-II	0.0575494	0.117687	0.103932	0.0628078	0.227573	0.113078
BTC	0.160591	0.0881087	0.12944	0.0430382	0.125444	0.0735228
Cardiotrophin-1 / CT-1	0.136806	0.12422	0.25493	0.0614067	0.123499	0.150264
CCL14 / HCC-1 / HCC-3	0.307394	0.275468	0.222913	0.368892	0.82256	0.593163
CCL28 / VIC	0.0906974	0.0877181	0.0801979	0.0496257	0.1169	0.0749554
CCR1	0.171181	0.265147	0.300769	0.124873	2.68271	0.230829
CCR2	0.127844	0.212001	0.119965	0.0619782	0.316042	0.270195
CCR3	0.22281	0.122867	0.101091	0.0388983	0.107146	0.0864877
CCR4	0.0765791	0.076008	0.0735644	0.0409656	0.287105	0.0793146
CCR5	0.198616	0.0604307	0.0639789	0	0.0748919	0.041099
CCR6	0.0870363	0.118362	0.0790164	0.0371944	0.198341	0.152319
CCR7	0.494076	0.660442	1.3968	3.10781	3.85256	4.83801
CCR8	0.207857	0.23407	0.219151	0.257999	0.679078	0.504409
CCR9	0.178933	0.327095	0.474912	1.15879	1.3215	1.64614
CD 163	0.109996	0.469423	0.181583	0.181093	0.167114	0.33315
CD14	0.178055	0.192154	0.223148	0.152047	0.340534	0.282319
CD27 / TNFRSF7	0.268482	0.158012	0.205029	0.151965	0.200396	0.130851
CD30 / TNFRSF8	0.0579459	0.0648876	0.0709677	0.0463453	0.177237	0.070203
CD30 Ligand / TNFSF8	0.0982802	0.1356	0.219116	0.0510508	0.227026	0.108492
CD40 / TNFRSF5	0.147922	0.161828	0.175162	0.0908647	0.672939	0.200413
CD40 Ligand / TNFSF5 /CD154	1.94865	2.4174	3.22379	5.10171	4.98834	2.52282
Cerberus 1	0.130773	0.192454	0.116989	0.0967632	0.460647	0.156563
Chem R23	0.056555	0.0637313	0.0742813	0.0327843	0.112175	0.0491503
Chordin-Like 1	0.147105	0.0786343	0.110714	0.0511268	0.142752	0.0684014
Chordin-Like 2	0.159228	0.144726	0.158211	0.636929	1.16709	0.352566
CLC	0.0940596	0.12537	0.142744	0.106159	1.05125	0.246115
CNTF R alpha	0.0517972	0.355028	0.584863	0.0667371	0.97468	0.100227
CNTF	0.207425	0.131892	0.159306	0.730673	0.956163	1.01428
Coagulation Factor III / Tissue Factor	0.121358	0.123442	0.127156	0.0446814	0.162069	0.084301
CRIM 1	0.229871	0.0950756	0.12744	0.0711044	0.144043	0.111225
Cripto-1	0.126678	0.0943013	0.299579	0.0695273	0.40818	0.081711
CRTH-2	0.120843	0.14065	0.164477	0.244418	0.653098	0.355238
Cryptic	0.114712	0.127718	0.112724	0.0599609	0.165114	0.0920927
Csk	0	0.10564	0.0501655	0.0411823	0.0708828	0.0867298
CTACK / CCL27	0.846274	0.86389	0.97555	2.72328	4.39589	2.87578
CTGF / CCN2	0.214474	0.0966729	0.106284	0.0450082	0.0757501	0.0418868
CTLA-4 /CD152	0.115962	0.153307	0.155413	0.135993	1.29987	0.199091
CV-2 / Crossveinless-2	0.196282	0.0956072	0.0800158	0.0333512	0.202234	0.0877294
CXCL14 / BRAK	0.480985	0.390807	0.769355	1.01564	3.3057	1.32861
CXCL16	0.308534	0.17127	0.0992704	0.0456311	0.177483	0.141192
CXCR1 / IL-8 RA	0.64571	0.465042	0.65983	2.39975	3.65298	2.64798
CXCR2 / IL-8 RB	0.406456	0.537136	1.14246	2.80504	2.96437	3.33405
CXCR3	0.0675079	0.0486659	0.0646389	0.0440626	0.0574915	0.0445193
CXCR4 (fusin)	0.0663344	0.0817716	0.104643	0.0958816	0.261035	0.237082
CXCR5 /BLR-1	0.0897957	0.182405	0.271597	0.122033	0.399729	0.410566
CXCR6	0.0683632	0.115295	0.191022	0.16119	0.330549	0.212939
D6	0.241983	0.374069	0.28635	0.269649	0.372701	0.387776
DAN	0.138057	0.0664276	0.0812693	0.0299148	0.124469	0.0582181
DANCE	0.0957446	0.0687172	0.0788511	0.0309844	0.0798124	0.0472577
DcR3 / TNFRSF6B	2.94054	0.17944	0.139677	0.0765322	0.167076	0.14355
Decorin	0.305701	0.217704	0.158395	0.0482479	0.148523	0.115237
Dkk-1	0.2952	0.210439	0.509869	0.0715572	0.303265	0.138844
Dkk-3	0	0	0	0	0.118824	0
Dkk-4	0.109356	0.130679	0.15697	0.147631	1.19906	0.12179
DR3 / TNFRSF25	0.155798	0.0598291	0.0544688	0.0266798	0.0751534	0.0410653
DR6 / TNFRSF21	0.305403	0.164093	0.0838073	0.0288271	0.143264	0.13577
Dtk	0.175363	0.0812811	0.122787	0.0346489	0.109204	0.0838714
EDA-A2	0.124557	0.0885907	0.0648264	0.0732091	0.0661032	0.0761458
EDAR	0.121561	0.378215	0.557926	0.0327023	0.079637	0.0732935
EDG-1	0.290369	0.202301	0.13753	0.774195	1.97696	0.76025
EGF	0.332847	0.458303	0.291378	0.105738	0.139099	0.189867
EGF R / ErbB1	0.235907	0.113244	0.0937944	0.0906833	0.177606	0.175363
EG-VEGF / PK1	0.615545	0.202041	0.148998	1.26374	1.15509	2.44274
EMAP-II	0.125783	0.169012	0.187139	0.0327143	0.183477	0.086947
ENA-78	0.114119	0.0504752	0.0483133	0.0762867	0.0877915	0.0742438
Endocan	0.386529	0.0679258	0.0967847	0.0418645	0.16126	0.191999
Endoglin / CD105	0.0948845	0.068883	0.0988653	0.0429322	0.0918069	0.0608472
Endostatin	0	0.556233	0.371341	0.0387122	0.101798	0.0647882
Endothelin	0.0694519	0.0826587	0.113379	0.141839	0.152811	0.146758
EN-RAGE	0.701128	0.253028	0.148707	0.355155	1.04177	0.878143
Eotaxin / CCL11	0.117642	0.0618186	0.0964045	0.0574041	0.132656	0.055742
Eotaxin-2 / MPIF-2	0.135321	0.0899299	0.0999615	0.064535	0.0967728	0.058007
Eotaxin-3 / CCL26	0.132734	0.0578156	0.071984	0.0367589	0.101974	0.0796424
Epiregulin	0.120312	0.183395	0.171388	0.0529627	0.0781305	0.0619952
ErbB2	0.11735	2.52369	3.48463	0.450209	0.515832	0.21538
ErbB3	2.59539	0.117963	0.767192	0.536394	0.798093	0.573495
ErbB4	0.090253	0.435673	0.562936	0.048622	0.180831	0.134233
Erythropoietin	0.250888	0.136627	0.188523	1.30283	1.91081	2.07367
E-Selectin	0.198835	0.0930271	0.0667275	0.154315	0.158576	0.165101
FACX	0.252476	0.247175	0.152117	0.0569693	0.197583	0.176901
FADD	0.279875	0.21701	0.118688	0.045337	0.188905	0.165993
FAM3B	0.069583	0.0731536	0.0431492	0.026501	0.0710895	0.0612175
Fas / TNFRSF6	0.367469	0.152096	0.110144	0.0369583	0.0785439	0.0736833
Fas Ligand	0.242305	0.356419	0.264915	0.171748	0.514863	0.437541
FGF Basic	0.246757	0.273765	0.264493	0.213863	0.783762	0.28967
FGF R3	0.234458	0.134594	0.117857	0.0627618	0.163761	0.0778968
FGF R4	0.57673	0.482377	1.14869	3.1332	3.31684	3.59284
FGF R5	0.180269	0.129844	0.106353	0.0298221	0.124622	0.102537
FGF-10 / KGF-2	0.118896	0.207018	0.177512	0.190403	0.97414	0.53655
FGF-11	0.53754	0.597292	0.517198	0.954327	2.77625	2.25759
FGF-12	0.157622	0.0943748	0.0867416	0.0295013	0.111029	0.0777633
FGF-13 1B	0.07091	0.0729194	0.137271	0.164847	0.433876	0.178531
FGF-16	0.141081	0.165831	0.238378	0.357069	2.22881	0.349639
FGF-17	0.0457556	0.0518588	0.0641663	0.071878	0.121484	0.0653494
FGF-18	0.0540146	0.0386445	0.0737812	0.0339567	0.26025	0.047856
FGF-19	0.20919	0.162712	0.0987587	0.0257321	0.108435	0.121032
FGF-20	0.0487564	0.0623075	0.119541	0.140796	0.110268	0.100078
FGF-21	0.21174	0.155673	0.098318	0.0364522	0.0985409	0.136235
FGF-23	0.161806	0.123751	0.254078	0.09927	0.247379	0.119916
FGF-4	0.128119	0.100258	0.104935	0.0383661	0.102807	0.145322
FGF-5	0.222903	0.0945244	0.122371	0.101191	0.0923597	0.0890386
FGF-6	0.202162	0.147507	0.974978	0.332866	1.28642	0.200178
FGF-7 / KGF	0.115596	0.0718819	0.242363	0.0973414	0.125513	0.0587388
FGF-8	0.315093	0.109774	0.151071	0.0813343	0.0967337	0.112086
FGF-9	0.605664	0.322177	1.15728	1.89172	3.64636	2.63553
FGF-BP	0.229042	0.0836552	0.088004	0.0502865	0.106056	0.0568421
FLRG	0.1161	0.106446	0.083619	0.0645991	0.0780553	0.0734756
Flt-3 Ligand	0.335025	0.377776	0.091498	0.359889	0.0982935	0.567665
Follistatin	1.39087	1.13159	1.89892	4.51299	5.66616	6.64798
Follistatin-like 1	0.421153	0.261767	0.40503	1.71422	2.50534	2.69448
Fractalkine	0.0978357	0.0485018	0.0555464	0.0777505	0.0469425	0
Frizzled-1	0.0619523	0.0838808	0.182381	0.111512	0.135093	0.101792
Frizzled-3	0	0.0365191	0.0386833	0.0324342	0.0592298	0.0414396
Frizzled-4	0.0557141	0.0651876	0.147267	0.151877	0.132961	0.113674
Frizzled-5	0.200466	0.141791	0.0891731	0.0273646	0.145241	0.098996
Frizzled-6	0.209608	0.129943	0.0843137	0.0306837	0.168462	0.0976396
Frizzled-7	0.0871978	0.061493	0.0560546	0.0321228	0.0812438	0.0554473
Galectin-3	0.218989	0.168857	0.247574	0.0692585	0.285039	0.162429
GASP-1 / WFIKKNRP	0.178583	0.0509025	0.091983	0.484911	0.749873	0.70221
GASP-2 / WFIKKN	0	0.131095	0.113727	0.037984	0.40213	0.0565723
GCP-2 / CXCL6	0.175817	0.0320853	0.0423088	0.0440552	0.111679	0.134695
GCSF	0	0.0500248	0.0681658	0.0244651	0.0607269	0.0475484
G-CSF R / CD 114	0.0469019	0.150854	0.289947	0.0510174	0.0614551	0.037245
GDF1	0	0.0577139	0.0717193	0.0324529	0.115221	0.0648759
GDF11	0	0.223946	0.217103	0.0459452	0.142488	0.0768426
GDF-15	0.151844	0.0376267	0.0572334	0.163932	0.844934	0.270783
GDF3	0.0457924	0.0874831	0.155856	0.0675787	0.194539	0.100904
GDF5	0.0631274	0.110503	0.183655	0.105949	0.263456	0.136422
GDF8	0	0.043651	0.051833	0.0331505	0.121728	0.060661
GDF9	0.0529195	0.0991573	0.134722	0.0587205	0.230155	0.105511
GDNF	0.134467	0.0848543	0.0559124	0.0466794	0.0892996	0.0548666
GFR alpha-1	0.079663	0.037554	0.0646727	0.0511628	0.0818201	0.0426989
GFR alpha-2	0	0.0942928	0.101227	0.0417612	0.210608	0.0575227
GFR alpha-3	0.151003	0.124288	0.139072	0.112244	0.195246	0.116054
GFR alpha-4	0.128694	0.0751354	0.0873324	0.0416371	0.0969623	0.0617746
GITR / TNFRF18	0.139294	0.0781548	0.0725028	0.0511141	0.0830745	0.061063
GITR Ligand / TNFSF18	0.127193	0.163013	0.229407	0.0657868	0.217041	0.137361
GLO-1	0.304686	0.236758	0.135974	0.0541571	0.189568	0.211018
Glucagon	0.0569339	0.0725143	0.0966372	0.199663	0.508894	0.299701
Glut1	0	0.0419178	0.0911906	0.0425921	0.85762	0.0586187
Glut2	0.0698132	0.0949201	0.191504	0.37528	0.59099	0.543588
Glut3	0.108224	0.288185	0.133849	0.119534	0.331864	0.327407
Glut5	0.0555462	0.0979087	0.145455	0.164164	0.348616	0.241293
Glypican 3	0.355941	0.189279	0.0912732	0.0525139	0.143955	0.148645
Glypican 5	0.136905	0.23631	0.325447	0.563582	1.12966	1.16887
GM-CSF	0	0.0342595	0.043564	0.05086	0.103673	0.0545239
GM-CSF R alpha	0.095241	0.0711794	0.10213	0.121891	0.139058	0.0840312
Granzyme A	0	0.039547	0.0534925	0.0349484	0.0952584	0.0524715
Grb2	0.293295	0.312953	0.244869	0.12155	0.279109	0.216302
GREMLIN	0.123294	0.436702	0.399146	0.140648	0.252691	0.330748
GRO	0	0.0584035	0.103725	0.046358	0.123618	0.0748637
GRO-a	0.189966	0.201183	0.211801	0.472046	0.845867	0.670383
Growth Hormone (GH)	0.156053	0.0952619	0.161864	0.0777645	0.177838	0.152943
Growth Hormone R (GHR)	0.670796	0.773438	1.61756	1.16085	2.59674	1.2872
HB-EGF	0.324115	0.115451	0.463612	1.02095	1.42756	2.10226
HCC-4 / CCL16	0.0681042	0.0595248	0.270065	0.0446741	0.0800849	0.0527096
HCR / CRAM-A/B	0.0624687	0.174941	0.177277	0.190608	0.573491	0.414354
Hepassocin	0.11902	0.0668703	0.0781493	0.0531328	0.112493	0.0727599
HGF	0.150507	0.112534	0.112588	0.0261116	0.0859263	0.0487827
HGFR	0	0.035297	0.0443396	0.0303049	0.0872089	0.044924
HRG-alpha	1.83955	2.28001	1.90968	1.90631	2.23498	1.92467
HRG-beta 1	0.17993	0.120544	0.0663935	0.0425554	0.105438	0.104239
HVEM / TNFRSF14	0.0798612	0.0733997	0.0974075	0.0904585	0.111984	0.0522408
I-309	0.0565774	0.0437698	0.112717	0.0280782	0.0874062	0.0702468
ICAM-1	0.0824096	0.131677	0.11765	0.0357526	0.0529937	0.0373199
ICAM-2	0.205147	0.0550927	0.0520658	0.0509828	0.122116	0.126942
ICAM-3 (CD50)	0	0.145095	0.125071	0	0.0826063	0.0448431
ICAM-5	0.0872857	0.0646406	0.0617784	0.125301	0.296637	0.297108
IFN-alpha / beta R1	0.0972826	0.11362	0.102416	0.0449935	0.0656005	0.0523069
IFN-alpha / beta R2	0.186954	0.0637279	0.155103	0.0923892	0.0761244	0.105068
IFN-beta	0.122023	0.043086	0.0690319	0.193991	0.118527	0.0640004
IFN-gamma	0	0.0683078	0.0665409	0.0452243	0.216313	0.071813
IFN-gamma R1	0.203919	0.0899196	0.137387	0.0342435	0.0818483	0.0472476
IGFBP-1	0.12291	0.123537	0.41309	0.0443967	0.191438	0.0723397
IGFBP-2	0.317744	0.0492701	0.138504	0.0765895	0.253256	0.125604
IGFBP-3	0.306638	0.0449115	0.0819791	1.3244	2.27915	1.42019
IGFBP-4	0.182823	0.0616853	0.116628	0.042158	0.190733	0.0805792
IGFBP-6	0.0758261	0.114803	0.135749	0.158588	0.328535	0.191106
IGFBP-rp1 / IGFBP-7	0.188413	0.0427297	0.0691696	0.135135	0.236252	0.206532
IGF-I	0.109582	0.16859	0.0907082	0.028429	0.104439	0
IGF-I SR	0.157017	0.703264	0.639701	0.0367796	0.0593331	0.0386169
IGF-II	0	0.11885	0.160221	0.239692	0.288237	0.395963
IGF-II R	0.154523	0.142851	0.13126	0.0566245	0.195168	0.123281
IL-1 alpha	0	0.0931758	0.0802112	0.0408636	0.111754	0.0699365
IL-1 beta	0.278038	0.115551	0.199295	0.0302375	0.0765394	0.0823889
IL-1 F10 / IL-1HY2	0.112653	0.0930134	0.114038	0.233324	0.220565	0.179156
IL-1 F5 / FIL1delta	0.0463423	0.0670695	0.0613191	0.0576662	0.204719	0.0904874
IL-1 F6 / FIL1 epsilon	0	0.171785	0.111988	0.0271799	0.1368	0.0573271
IL-1 F7 / FIL1 zeta	0.0574503	0.0725647	0.0881444	0.254114	1.04464	0.93591
IL-1 F8 / FIL1 eta	0.172595	0.138594	0.0946286	0.0634734	0.0989089	0.0473906
IL-1 F9 / IL-1 H1	0.193819	0.880143	0.384598	0.0854443	0.331662	0.0914398
IL-1 R3 / IL-1 R AcP	0.893441	0.0957935	0.109838	0.536847	0.599102	1.00674
IL-1 R4 / ST2	0.149767	0.055885	0.0730509	0.0952834	0.218867	0.0943954
IL-1 R6 / IL-1 Rrp2	0	0.0449543	0.044034	0.0345602	0.0725506	0.0502106
IL-1 R8	0	0.058195	0.0649419	0.0297867	0.0416837	0.0457543
IL-1 R9	0.0549275	0.420204	0.402935	0.0495603	0.0958817	0.0767873
IL-1 ra	0.470707	0.0441338	0.0694797	2.76347	2.88852	3.07741
IL-1 sRI	0.0498515	0.0660593	0.242272	0.0392871	0.0766083	0.0558607
IL-1 sRII	0.06228	0.0366387	0.0513755	0.0255394	0.300479	0.0807856
IL-10	0	0.101335	0.129417	0.029558	0.0927606	0.0561582
IL-10 R alpha	0.0798597	0.203454	0.0991957	0.0811489	0.116574	0.0936069
IL-10 R beta	0.273115	0.0647927	0.120609	0.0481865	0.0958269	0.145289
IL-11	0	0.095461	0.06923	0.0459405	0.104923	0.0649312
IL-12 p40	0.136101	0.0721032	0.0593744	0.0677801	0.0836007	0.0734358
IL-12 p70	0.145983	0.0623117	0.109615	0.0344055	0.0685243	0.0518584
IL-12 R beta 1	0.126207	0.156274	0.105646	0.0511215	0.102475	0.0607764
IL-12 R beta 2	0.221764	0.0784967	0.0671415	0.0644857	0.152775	0.160064
IL-13	0	0.0706016	0.118877	0.0407262	0.0850478	0.0555889
IL-13 R alpha 1	0.0989213	0.113947	0.058582	0.247513	0.247322	0.0683839
IL-13 R alpha 2	0.214343	0.0550354	0.101355	0.0273366	0.073733	0.112496
IL-15	0.047252	0.0541176	0.0582942	0.0480165	0.123626	0.077996
IL-15 R alpha	0.0456405	0.0479378	0.0719058	0.0387322	0.0827504	0.0898979
IL-16	0.167465	0.0616118	0.0932188	0.0551767	0.0611122	0.0500325
IL-17	0	0.150513	0.0919004	0.0578176	0.108288	0.0837365
IL-17B	0.0802385	0.175976	0.18704	0.0604584	0.515561	0.200544
IL-17B R	0.156333	0.141754	0.275239	0.47622	0.983868	0.709226
IL-17C	0.113836	0.117386	0.0954939	1.24245	2.52771	2.42376
IL-17D	0.0550218	0.160859	0.08428	0.121682	0.241461	0.173326
IL-17E	0.24394	0.125916	0.071498	0.131474	0.118463	0.148711
IL-17F	0.169675	0.0602282	0.0676772	0.027518	0.0953305	0.0991579
IL-17R	0.126691	0.220336	0.216488	0.066445	0.0912102	0.0506382
IL-17RC	0.326983	0.175174	0.237475	0.147386	0.276272	0.230118
IL-17RD	0.245246	0.462236	0.143363	0.592963	0.30251	0.217958
IL-18 BPa	0.210845	0.121682	0.105219	0.203332	0.130225	0.533536
IL-18 R alpha /IL-1 R5	0.352001	0.13815	0.123655	0.206565	0.209615	0.254523
IL-18 R beta /AcPL	0.170405	0.120875	0.121248	0.072889	0.119775	0.121472
IL-19	0.0578676	0.034956	0.0507536	0.138941	0.789799	0.423786
IL-2	0	0.538825	0.736172	0.0267678	0.088656	0.0538663
IL-2 R alpha	0.597305	0.0709264	0.112824	0.648469	1.52214	1.12325
IL-2 R beta /CD122	0.0962258	0.0627826	0.0974359	0.048502	0.119139	0.0732901
IL-2 R gamma	0.0893081	0.0929262	0.0889306	0.0384281	0.110709	0.0615493
IL-20	0.264132	0.0651722	0.101743	0.108109	0.200679	0.0830687
IL-20 R alpha	0.0652089	0.233152	0.15598	0.0818978	0.101603	0.0730513
IL-20 R beta	0.252075	0.0471566	0.0730794	0.12331	0.208303	0.214329
IL-21	0	0.174833	0.157206	0.0450602	0.0994758	0.067758
IL-21 R	0.197011	0.0780805	0.0588245	0.119607	0.120986	0.240449
IL-22	0	0.0346842	0.0716402	0.0431476	0.163709	0.0645919
IL-22 BP	0.0684415	0.132855	0.0842045	0.0517863	0.0630322	0
IL-22 R	0.0799652	0.0763635	0.0643475	0.0395325	0.0722625	0.119877
IL-23	0.14539	0.0693804	0.087861	0.0472269	0.174914	0.0741858
IL-23 R	0	0.0661268	0.0677518	0.119634	0.144307	0.077685
IL-24	0	0.0784616	0.096878	0.0406202	0.191262	0.12221
IL-26	0.0725742	0.161747	0.133775	0.120832	0.141985	0.0958354
IL-27	0.247795	0.0373156	0.0555864	0.0573848	0.137763	0.10944
IL-28A	0	0.445016	0.940733	0	0.0500684	0
IL-29	0.386171	0.0540039	0.0812986	1.10674	6.50089	2.04373
IL-3	0.131882	0.088824	0.0771081	0.0313752	0.0874078	0.0476051
IL-3 R alpha	0.119711	0.0746158	0.0653194	0.277071	0.0974337	0.0605727
IL-31	0.0810619	0.142694	0.0998141	0.0313972	0.08784	0.0630872
IL-31 RA	0.19299	0.128412	0.0740681	0	0.124583	0.117929
IL-4	0.258842	0.321598	0.791675	0.0540877	0.110957	0.0835348
IL-4 R	0.508127	0.0455132	0.0789622	1.6324	4.6987	2.64698
IL-5	0	0.0805136	0.0971409	0.0312665	0.157387	0.0682935
IL-5 R alpha	0.123272	0.0305512	0.0431341	0.0415024	0.0730518	0.0520121
IL-6	0.0468507	0.104168	0.0894423	0	0.0510189	0.0413863
IL-6 R	0.309496	0.0474182	0.0950053	0.116882	0.115897	0.127169
IL-7	0	0.393247	0.538094	0.055967	0.133483	0.0794872
IL-7 R alpha	0.270529	0.0377566	0.0523785	0.314213	0.542012	0.345103
IL-8	0	0.0651765	0.092047	0.0274987	0.407057	0.0580312
IL-9	0	0.0267857	0.0393896	0.051899	0.12209	0.0792862
Insulin	0	0.0454499	0.0474551	0.0513875	0.0563247	0.04746
Insulin R	0	0.0801273	0.07816	0.0319241	0.103175	0.0431184
Insulysin / IDE	0.128824	0.0444295	0.0681489	0.0711925	0.0635756	0.0790468
IP-10	0.114701	0.120419	0.175235	0.0617268	0.0672417	0.0679064
I-TAC / CXCL11	0.287155	0.0519836	0.0790883	0.798835	1.60368	1.33479
Kininostatin / kininogen	0.349819	0.31199	0.399427	0.612319	0.464813	0.64751
Kremen-1	0	0.04234	0.0970796	0.118574	0.0963766	0.0620228
Kremen-2	0.0519251	0.057972	0.105258	0.114409	0.423226	0.0856655
Latent TGF-beta bp1	0.130877	0.226379	0.190301	0.0933615	0.133635	0.0878279
LBP	0.354846	0.0499008	0.0409709	0.2067	0.28703	0.444344
Lck	0	0.109394	0.0690826	0.0279715	0.0449348	0.0474378
LECT2	0.133809	0.355266	0.649563	0.0428742	0.081568	0.0954752
Lefty - A	0.504116	0.0900948	0.0937864	1.56657	3.03429	2.6131
Leptin (OB)	0.182097	0.0811007	0.0818547	0.0409463	0.0955779	0.0708613
Leptin R	0.0501265	0.0585352	0.0622536	0.0479791	0.212381	0.0806608
LFA-1 alpha	0.0700786	0.0620374	0.0531451	0.0645437	0.0610715	0.051542
LIF R alpha	0	0.0500632	0.188475	0.0425334	0.0522358	0.0761458
LIF	0.0724368	0.164089	0.14471	0.0963377	0.434928	0.189154
LIGHT / TNFSF14	0.0755751	0.118665	0.268426	0.0520144	0.123299	0.0578936
Lipocalin-1	0.170947	1.05412	1.99085	0.762078	1.08427	1.53489
Lipocalin-2	0.571772	0.116908	0.0848983	2.7783	4.1571	3.6342
LRP-1	0.198501	0.121634	0.281194	0.0353552	0.107447	0.122282
LRP-6	0.195871	0.116134	0.122727	0.043299	0.336099	0.132318
L-Selectin (CD62L)	0.11414	0.100177	0.104668	0.0504272	0.179124	0.122622
Lymphotactin / XCL1	0.0844512	0.0320169	0.0499408	0	0.0471711	0
Lymphotoxin beta / TNFSF3	0	0	0.552375	0.446604	0.835998	0.0447048
Lymphotoxin beta R / TNFRSF3	0.0667581	0.0487445	0.100831	0.0502625	0.10553	0
MAC-1	0.0688652	0.0770925	0.0954708	0.0353692	0.0841003	0.059648
MCP-1	0	0.108345	0.102048	0.0362114	0.0677585	0.0485952
MCP-2	0.132765	0.0564652	0.0486038	0.0562844	0.200355	0.0763441
MCP-3	0.116814	0.154965	0.395681	0.0440946	0.127129	0.0784823
MCP-4 / CCL13	0.0926447	0.0711939	0.099695	0.0309511	0.060669	0.0410288
M-CSF	0.149762	0.0805922	0.0846335	0.813111	1.05564	0.997724
M-CSF R	0.209926	0.03204	0.03707	0.0522398	0.0765002	0.0679671
MDC	0.139766	0.0915622	0.127342	0.345422	0.595016	0.765884
MFG-E8	0.12055	0.0569131	0.0675048	0.0856817	0.10444	0.0605585
MFRP	0.108715	0.0773019	0.194577	0.170325	0.362442	0.108317
MICA	0.291515	0.128339	0.137266	0.12207	0.125297	0.139006
MIF	0.261627	0.213083	0.208642	0.104743	0.233278	0.34723
MIG	0	0.0273575	0	0	0.0612844	0.0454791
MIP 2	0.046288	0.107592	0.107906	0.0793377	0.129793	0.1306
MIP-1a	0.320583	0.255111	0.56263	1.83814	2.65786	2.63463
MIP-1b	0	0.158402	0.103591	0.125392	0.397722	0.476998
MIP-1d	0.131905	0.0662815	0.0844408	0	0.0829195	0.0511124
MIP-3 alpha	0.108183	0.0841287	0.0832557	0.0958409	0.904998	0.0798218
MIP-3 beta	0.173623	0.141314	0.0994134	0.0382121	0.108797	0.128884
MMP-1	0	0.0415349	0.066158	0.0382827	0.071539	0.041559
MMP-10	0.0920659	0.167384	0.136723	0.157666	0.409843	0.45808
MMP-11 /Stromelysin-3	0	0.050823	0.0630905	0.0312579	0.295118	0.0571854
MMP-12	0.122264	0.0663063	0.0875527	0.0405515	0.0917834	0.0561204
MMP-13	0.203865	0.104357	0.0792971	0.0383761	0.0884508	0.103042
MMP-14	0.210341	0.0737749	0.103001	0.0425714	0.0943548	0.0504629
MMP-15	0.132581	0.0769729	0.0703458	0.0394278	0.0859091	0.0629111
MMP-16 / MT3-MMP	0.184899	0.150923	0.108202	0.131327	0.142008	0.123333
MMP-19	0	0.201783	0.0644737	0.0447141	0	0.0714042
MMP-2	0.102613	0.132065	0.130303	0.166984	0.274348	0.179908
MMP-20	0	0.152385	0.0511659	0.0317407	0.0440046	0.0806076
MMP-24 / MT5-MMP	0	0.0463969	0.0493251	0.046432	0.0630791	0.0584528
MMP-25 / MT6-MMP	0.105396	0.0459072	0.0663961	0.0341828	0.0431041	0.060164
MMP-3	0	0.0376216	0.0775647	0	0.0647673	0.0392779
MMP-7	0.045463	0.103788	0.0755153	0.289634	0.79306	0.980745
MMP-8	0.150682	0.389194	0.71445	0.542236	1.52059	1.41922
MMP-9	0.439164	0.411647	0.464005	0.682252	0.858677	0.793773
MSP alpha Chain	0	0.0689249	0.0950515	0.0636661	0.0814678	0.0803492
Musk	0	0.036484	0.0557783	0.0336106	0.0509359	0.0486276
NAP-2	0.442219	0.21766	0.329455	0.497233	0.417983	0.692542
NCAM-1 / CD56	0.475374	0.283242	0.272884	0.224714	0.33993	0.321124
Neuritin	0.06032	0.0859943	0.095724	0.121606	0.192164	0.119881
NeuroD1	0.19095	0.115313	0.079735	0.0310985	0.111215	0.0974292
Neuropilin-2	0.135977	0.0824271	0.12601	0.0379773	0.23037	0.0849155
Neurturin	0.0567596	0.176807	0.101068	0.103519	0.267869	0.245304
NGF R	0.0546989	0.0556585	0.108685	0.113007	0.0719273	0.0665945
Nidgen-1	0.059599	0.0743312	0.0846717	0.0513289	0.0881094	0.067213
NOV / CCN3	0	0.0290907	0	0.0357326	0.0671384	0
NrCAM	0.830248	0.814387	0.975259	3.61267	4.89301	5.22668
NRG1 Isoform GGF2	0.276057	0.203981	0.0719147	0.0646944	0.0993427	0.149152
NRG2	0.0588124	0.125081	0.16725	0.0888934	0.23675	0.119061
NRG3	0	0.0733911	0.110362	0.0532528	0.108698	0.0981792
NT-3	0.230202	0.516298	0.0875625	0.0948746	0.138438	0.98096
NT-4	0.125503	0.193909	0.167977	0.101681	0.0965974	0.436834
Orexin A	0.205812	0.0815007	0.0642534	0.0427688	0.0583058	0.0933229
Orexin B	0.133468	0.0994992	0.268839	0.337494	0.263919	0.140293
OSM	0.30211	0.373903	0.891779	1.05998	2.46993	1.66651
Osteoactivin / GPNMB	0.140945	0.10733	0.186036	0.407044	0.791691	0.741887
Osteocrin	0.14601	0.117255	0.140849	0.182004	0.179688	0.12911
Osteoprotegerin / TNFRSF11B	1.44997	1.00795	1.2488	0.872588	0.742537	1.88933
OX40 Ligand / TNFSF4	0.106183	0.0822083	0.102016	0.0767235	0.105392	0.0682301
PARC / CCL18	0.209283	0.09853	0.260809	0.0797452	0.11373	0.155145
PD-ECGF	0.113342	0.114984	0.109106	0.0828555	0.378855	0.0752542
PDGF R alpha	0.142007	0.0589283	0.0706665	0.0483346	0	0.0537867
PDGF R beta	0.0530426	0.132842	0.14776	0.0383421	0.0730299	0.0570849
PDGF-AA	0.165591	0.0636219	0.0882741	0.116709	0.176368	0.115342
PDGF-AB	0.0722801	0.0368353	0.0962481	0.0350577	0.0532568	0.0546662
PDGF-BB	0.113953	0.0814255	0.0635418	0.0387222	0.0966475	0.0562344
PDGF-C	0.134071	0.112163	0.0782275	0.0574728	0.067605	0.0938578
PDGF-D	0.172883	0.0595547	0.0661811	0	0.0744878	0.0974784
PECAM-1 /CD31	0.0828812	0.11777	0.0872827	0.0672979	0.0801194	0.0817117
Pentraxin3 / TSG-14	0.223708	0.111456	0.115197	0	0.087032	0.093099
Persephin	0.17028	0.907916	0.714769	0.0269945	0.129582	0.102393
PF4 / CXCL4	0.72506	0.0891565	0.0720444	1.88163	1.61867	2.12706
PlGF	0.253968	0.139585	0.14918	0.0312992	0.0735138	0.0567423
PLUNC	0.0664048	4.37797	3.92231	0.0605818	0.203626	0.108572
Prdx6	0.233565	0.124371	0.146535	0.0305416	0.310854	0.132425
Pref-1	0.0629291	0.173965	0.162379	0.0906946	0.318075	0.158071
Progranulin	0.219873	0.410517	0.161308	0.0798259	0.180623	0.160339
Prolactin	0.261811	0.908666	0.550337	0.122451	0.142899	0.693424
P-selectin	0.77663	0.177486	0.102244	0.509911	0.727722	0.975998
RAGE	0.164675	0.112324	0.070989	0.0409056	0.0916925	0.0853627
RANK / TNFRSF11A	0	0.0599914	0.0607816	0.0321268	0.0457758	0.0480354
RANTES	0.0818708	0.0442227	0.0482049	0.0264223	0.0449019	0.0545091
RELM beta	0.0783552	0.0450611	0.102653	0.0365855	0.109752	0.0538225
RELT / TNFRSF19L	0.172789	0.225409	0.283936	0.512721	1.40508	0.869959
ROBO4	0.146097	0.110474	0.142091	0.320952	0.308422	0.410779
S100 A8/A9	0.862822	1.04961	0.204228	0.813529	1.31188	1.56239
S100A10	0.236381	0.122981	0.10747	0.0306217	0.0933713	0.107191
SAA	0.130997	0.12296	0.133812	0.081201	0.11596	0.977368
SCF	0.156007	0.0690719	0.148575	0.0361081	0.0831826	0.0444795
SCF R /CD117	0.120963	0.116733	0.116307	0.0440826	0.103275	0.0736186
SDF-1 / CXCL12	0.157583	0.191517	0.150407	0.0690651	0.192396	0.159292
sFRP-1	0.168667	0.138913	0.0790181	0.0337486	0.0917646	0.115751
sFRP-4	0.21613	0.149087	0.0756521	0.0441286	0.0907592	0.100093
sgp130	0.302956	0.393976	0.419941	0.418803	0.425114	0.394676
SIGIRR	0.254503	0.234419	0.838794	2.63617	1.66112	3.50556
Siglec-5/CD170	0.136012	0.0859695	0.0927746	0.0908113	0.0416774	0.107316
Siglec-9	0.310937	0.307741	0.683661	2.71672	3.10796	3.45261
SLPI	0.0568699	0.0485804	0.0599066	0.0352171	0.0641409	0.0661783
Smad 1	0.191513	0.126433	0.120222	0.0363501	0.114067	0.137319
Smad 4	0	0.0388702	0.0618654	0.0485927	0.0433077	0.0488535
Smad 5	0.173974	0.0912332	0.0934364	0.0487501	0.0796856	0.0779757
Smad 7	0.0527948	0.078307	0.0826507	0.115273	0.156259	0.0826087
Smad 8	0.152506	0.117889	0.109303	0.0605291	0.118893	0.119403
Soggy-1	0.235411	0.159524	0.196037	0.044292	0.437507	0.109957
Sonic Hedgehog (Shh N-terminal)	0	0.0645688	0.0581733	0.04237	0.0678055	0.0665695
SPARC	0.209453	0.208648	0.132604	0.141051	0.19377	0.244401
Spinesin	0.140659	0.119143	0.108374	0.114988	0.121646	0.132784
TACI / TNFRSF13B	0.481764	0.206528	0.25241	0.15739	0.20687	0.239225
Tarc	0.0628092	0.0620015	0.0531869	0	0	0.0440182
TCCR / WSX-1	0.167583	0.133401	0.110865	0.0619536	0.0975856	0.132173
TECK / CCL25	0.060093	0.0303059	0.0396952	0	0	0
TFPI	0	0.131087	0	0	0	0.0989616
TGF-alpha	0.15574	0.0696402	0.0554576	0	0.050723	0.0735073
TGF-beta 1	0	0.037413	0.0362634	0.0321161	0.0472479	0.0464375
TGF-beta 2	0.0672553	0.124497	0.072891	0.0475297	0.124602	0.195861
TGF-beta 3	0.0732057	0.0463294	0.0788707	0.0340227	0.0619359	0.0419509
TGF-beta 5	0.357506	0.366026	0.140559	0.0533335	0.207623	0.271195
TGF-beta RI / ALK-5	0.191668	0.144633	0.0741738	0.0412057	0.0786974	0.117236
TGF-beta RII	0.06691	0.0467447	0.0652741	0.0259875	0.0608929	0.0367823
TGF-beta RIII	0.165657	0.142077	0.0840561	0.0395351	0.0650007	0.11464
Thrombopoietin (TPO)	0	0.0747748	0.0530101	0.0468234	0.0752317	0.0602597
Thrombospondin-1	3.98591	6.37766	6.82032	6.15481	6.6588	8.38516
Thrombospondin-2	0.658764	0.681629	1.62959	4.06413	4.002	4.98503
Thrombospondin-4	0	0.0500769	0.0548997	0.0348183	0.0628145	0.0549947
Thymopoietin	0.112996	0.0415503	0.0549405	0	0.0417636	0.0479039
Tie-1	0.09001	0.0397932	0.0692629	0.0310311	0.0539365	0.0442637
Tie-2	0.25647	0.0830715	0.0814683	0.0324829	0.0452104	0.0830795
TIMP-1	0.0712985	0.145893	0.20299	0.128575	0.427846	0.241161
TIMP-2	0.141136	0.0526442	0.159269	0.103754	0.117407	0.0553987
TIMP-3	0.0909053	0.120855	0.0857404	0.0912341	0.120176	0.109277
TIMP-4	0.156071	0.138652	0.0940805	0.0271226	0.0918288	0.0890568
TL1A / TNFSF15	0.157796	0.133299	0.0692052	0	0.0818389	0.106189
TLR1	0.140071	0.18681	0.136681	0.22249	0.110892	0.161432
TLR2	0.175665	0.127876	0.119539	0.0264917	0.161546	0.112528
TLR3	0.18562	0.133921	0.101619	0.0355839	0.091312	0.114114
TLR4	0.165222	0.121493	0.127937	0.0411076	0.126475	0.0938436
TMEFF1 / Tomoregulin-1	0.3905	0.934041	1.77663	2.5286	2.50375	4.17679
TMEFF2	0.316602	0.446821	0.428843	0.342464	0.459318	0.483116
TNF RI / TNFRSF1A	0.0980276	0.0316417	0.0505271	0	0.0381194	0.0402761
TNF RII / TNFRSF1B	0.153654	0.0809777	0.0525668	0	0.0419343	0.0882946
TNF-alpha	0	0.0266234	0.040683	0	0	0.0385838
TNF-beta	0.0931547	0.0872908	0.178257	0.192435	0.0809776	0.198067
TPX	0	0	0	0.030529	0.0393534	0.0470675
TRADD	0.126933	0.16706	0.634159	1.47285	2.1036	2.08943
TRAIL R1 / DR4 / TNFRSF10A	0.168557	0.119577	0.161021	0.0483106	0.0712038	0.0711938
TRAIL R2 / DR5 / TNFRSF10B	0.0833161	0.0430143	0.177753	0.076066	0.539483	0.155655
TRAIL R3 / TNFRSF10C	0.0562704	0.0709093	0.103099	0	0.0778032	0
TRAIL R4 / TNFRSF10D	0.151254	0.0410059	0.0397662	0.0314079	0.0933792	0.0543627
TRAIL / TNFSF10	0.127996	0.0992009	0.0864138	0	0	0
TRANCE	0.349309	0.104486	0.0673556	0.126309	0.291692	0.194873
TREM-1	0	0.0283514	0.0413707	0.0366189	0.0430039	0
TROY / TNFRSF19	0.176504	0.172373	0.0846851	0.031602	0.0891696	0.121852
TSG-6	0.0478355	0.0633621	0.0841822	0.0321241	0.100724	0.0625577
TSLP R	0.128984	0.0851944	0.057977	0.0265584	0.0456897	0.0801644
TWEAK / TNFSF12	0.170296	0.121929	0.10677	0.0376339	0.0849491	0.137025
TWEAK R / TNFRSF12	0.148629	0.103579	0.0987471	0.0260315	0.123289	0.108921
Ubiquitin+1	0.142678	0.389058	0.200474	0.812344	1.14633	1.15763
uPA	0.20889	0.178919	0.876872	2.72274	3.08725	3.11064
uPAR	0.0845407	0.0306205	0.0525188	0.0256168	0.041964	0
Vasorin	0.163329	0.169418	0.110613	0.0427895	0.0621019	0.116587
VCAM-1 (CD106)	0.0488923	0.035567	0.0505413	0.0321648	0	0
VE-Cadherin	0.130408	0.167513	0.174073	0.0458238	0.130208	0.128954
VEGF	0	0.0892539	0.0926733	0.420554	0.754012	0.771148
VEGF R2 (KDR)	0.0573352	0.067572	0.0577913	0.0298828	0.0383026	0
VEGF R3	0.0969373	1.19293	0.0997812	0.0762741	0.0812689	1.22878
VEGF-B	0.164629	0.160966	0.0549512	0.0295153	0.0632467	0.138736
VEGF-C	0.207117	0.183818	0.339914	0.0957222	0.0963359	0.172394
VEGF-D	0	0.0293693	0.0365255	0.0293259	0	0
VEGI / TNFSF15	0.0554535	0.0360482	0.0390786	0	0	0
WIF-1	0	0.0487386	0.0374538	0	0	0.0377219
WISP-1 / CCN4	0.126637	0.094785	0.100624	0.0260782	0.0828005	0.100536
XEDAR	0.124888	0.0292026	0.0709792	0.074977	0.056569	0.078974
