# Supplementary material for: Rejuvenation of three germ layers tissues by exchanging old blood plasma with saline-albumin
Source: publisher site journal article supplement (doi:10.18632/aging.103418), 2020-05-30
Supplement: Supplementary file [file aging-v12i10-103418-supplementary-material-SD2.pdf]

## SUPPLEMENTARY TABLE

Supplementary Table 1. Proteins that are changed by the NBE or TPE with highest statistical significance.

### A. Mouse comparative proteomics: OO versus ONBE.

| Category                     | ID                   | p           | Significance | Change |
|------------------------------|----------------------|-------------|--------------|--------|
| Immune: Chemokines           | Eotaxin-2            | 8.2E-04     | ***          | +      |
|                              | MIP-2                | 1.2E-03     | **           | +      |
|                              | PF-4                 | 1.4E-03     | **           | +      |
|                              | CCL1 / I-309 / TCA-3 | 3.3E-03     | **           | +      |
|                              | IL-16                | 4.3E-03     | **           | +      |
|                              | CXCL14 / BRAK        | 9.1E-03     | **           | +      |
|                              | Fractalkine          | 1.4E-02     | *            | +      |
|                              | CXCR2 / IL-8 RB      | 2.7E-02     | *            | +      |
|                              | CCR6                 | 2.7E-02     | *            | +      |
|                              | Lungkine             | 3.0E-02     | *            | +      |
|                              | CCL28                | 3.4E-02     | *            | +      |
|                              | TCA-3                | 4.0E-02     | *            | +      |
|                              | CXCR6                | 4.2E-02     | *            | +      |
|                              | Immune: GF/DF        | IL-3 R beta | 5.2E-04      | ***    |
| Erythropoietin (EPO)         |                      | 5.9E-03     | **           | +      |
| Lymphotoxin beta R / TNFRSF3 |                      | 4.7E-02     | *            | +      |
| Tissue Homeostasis           | IL-21                | 5.2E-02     | *            | +      |
|                              | TIMP-2               | 6.0E-04     | ***          | +      |
| Growth Factors               | VCAM-1               | 8.0E-03     | **           | +      |
|                              | BTC (Betacellulin)   | 6.3E-03     | **           | +      |
| Pathways                     | Prolactin            | 9.2E-03     | **           | +      |
|                              | Osteoactivin / GPNMB | 2.0E-02     | *            | +      |
|                              | GDF-5                | 2.4E-02     | *            | +      |
| Other                        | IGFBP-2              | 3.2E-03     | **           | +      |
|                              | AgRP                 | 3.5E-03     | **           | +      |
| Immune: Cell-fate            | Urokinase            | 9.9E-03     | **           | +      |
|                              | TWEAK R / TNFRSF12   | 6.7E-03     | **           | +      |
|                              | LIGHT / TNFSF14      | 1.4E-02     | *            | +      |
| Angiogenic                   | TNF-beta / TNFSF1B   | 2.6E-02     | *            | +      |
|                              | TCCR / WSX-1         | 2.5E-02     | *            | +      |
| Immune: Interleukins         | Angiopoietin-like 3  | 3.1E-02     | *            | +      |
|                              | IL-1 RII             | 2.8E-02     | *            | +      |

### B. YY versus OO.

| ID            | p       | Change |
|---------------|---------|--------|
| IL-20 R alpha | 1.8E-02 | +      |
| Fas Ligand    | 1.8E-02 | +      |
| FGF-21        | 2.1E-02 | +      |
| IL-10 R alpha | 2.1E-02 | +      |
| G-CSF         | 2.3E-02 | +      |
| MIP-1 gamma   | 2.5E-02 | +      |

|                      |         |   |
|----------------------|---------|---|
| Axl                  | 2.5E-02 | + |
| CD27 Ligand / TNFSF7 | 2.6E-02 | + |
| CD40                 | 3.6E-02 | + |
| EGF R                | 3.7E-02 | + |
| FADD                 | 3.8E-02 | + |
| L-Selectin           | 4.2E-02 | + |
| E-Selectin           | 4.5E-02 | + |

### C. O pre TPE versus O after TPE

| Category                 | ID                     | p                | Significance | Change |
|--------------------------|------------------------|------------------|--------------|--------|
| Pathways                 | IFN-alpha / beta R1    | 6.0E-04          | ***          | -      |
|                          | Siglec-9               | 2.3E-03          | **           | +      |
|                          | BMPR-IB / ALK-6        | 6.9E-03          | **           | +      |
|                          | TRAIL / TNFSF10        | 1.4E-02          | *            | -      |
|                          | TMEFF1 / Tomoregulin-1 | 1.4E-02          | *            | +      |
|                          | Follistatin            | 1.5E-02          | *            | +      |
|                          | VEGI / TNFSF15         | 1.9E-02          | *            | -      |
|                          | Glut2                  | 2.2E-02          | *            | +      |
|                          | IL-12 R beta 1         | 2.3E-02          | *            | -      |
|                          | ICAM-1                 | 2.5E-02          | *            | -      |
|                          | Follistatin-like 1     | 2.7E-02          | *            | +      |
|                          | Glypican 5             | 4.0E-02          | *            | +      |
|                          | Endothelin             | 4.3E-02          | *            | +      |
|                          | Tissue Homeostasis     | Thrombospondin-2 | 5.4E-05      | ***    |
| uPA                      |                        | 5.8E-03          | **           | +      |
| Ubiquitin+1              |                        | 1.1E-02          | *            | +      |
| NrCAM                    |                        | 1.5E-02          | *            | +      |
| Kininostatin / kininogen |                        | 2.3E-02          | *            | +      |
| Lipocalin-2              |                        | 2.7E-02          | *            | +      |
| MMP-9                    |                        | 2.9E-02          | *            | +      |
| GFs & Their Receptors    | FGF R4                 | 2.0E-03          | **           | +      |
|                          | BDNF                   | 2.0E-03          | **           | +      |
|                          | IGF-I                  | 9.6E-03          | **           | -      |
|                          | IGF-II                 | 1.1E-02          | *            | +      |
|                          | CNTF                   | 2.0E-02          | *            | +      |
| Immune: Interleukins     | IL-6                   | 1.5E-03          | **           | -      |
|                          | IL-1 ra                | 6.3E-03          | **           | +      |
|                          | IL-17D                 | 6.8E-03          | **           | +      |
|                          | IL-31                  | 1.3E-02          | *            | -      |
|                          | IL-1 F10 / IL-1HY2     | 3.4E-02          | *            | +      |
| Immune: Chemokines       | IL-17C                 | 4.2E-02          | *            | +      |
|                          | CXCR2 / IL-8 RB        | 1.0E-03          | **           | +      |
|                          | CCR9                   | 3.4E-03          | **           | +      |
|                          | CCR7                   | 6.3E-03          | **           | +      |
|                          | MIP-1a                 | 1.6E-02          | *            | +      |
|                          | MIP 2                  | 1.8E-02          | *            | +      |
| PF4 / CXCL4              | 2.6E-02                | *                | +            |        |

|                  |                 |         |   |   |
|------------------|-----------------|---------|---|---|
|                  | CXCR1 / IL-8 RA | 3.5E-02 | * | + |
|                  | TECK / CCL25    | 3.9E-02 | * | - |
| Angiogenic       | Angiopoietin-2  | 1.1E-02 | * | + |
|                  | Angiogenin      | 1.3E-02 | * | + |
|                  | ROBO4           | 1.7E-02 | * | + |
|                  | Epiregulin      | 2.0E-02 | * | - |
|                  | VEGF            | 2.0E-02 | * | + |
|                  | Erythropoietin  | 2.7E-02 | * | + |
|                  | VEGF-C          | 3.6E-02 | * | - |
|                  | Angiostatin     | 4.4E-02 | * | + |
| Immune: Adaptive | TRADD           | 1.3E-02 | * | + |
|                  | SIGIRR          | 2.9E-02 | * | + |
| Immune: GF/DF    | M-CSF           | 1.2E-02 | * | + |

The results of comparative proteomics (described in main text) were analyzed to identify the proteins which differ the most (with highest statistical significance) between the OO vs ONBE (**A**), YY vs OO (**B**) and O pre TPE vs O after TPE (**C**). The names and categories of the proteins, as well as the p-values and direction of the change (+ means upregulated, - means down-regulated) are shown.
